# Supplementary material for: The Yin and Yang of Breast Cancer: Ion Channels as Determinants of Left-Right Functional Differences
Source: Preprints.org preprint supplement (doi:10.20944/preprints202305.1160.v1), 2023-05-16
Supplement: Supplementary file 1 [file SupFile 1A.xlsx]

## Sheet: Mouse 2 Left
Region 2
	ROI	Area	SD	Integrated Density		MT/DB	Normalized to KCl	Mt/Db KCl
DiBAC (DB)	1	2.769	4.931	21.989		0.342262	0.860834	0.397594
	2	7.307	2.786	24.867		0.480959	1.20967
	3	2.708	3.429	13.963		0.672062	1.69032
	4	2.116	4.539	14.149		0.250194	0.629271
	5	0.917	7.191	14.396		0.512642	1.28936
	6	2.344	2.884	8.561		1.1918	2.99753
Mitotracker (MT)	1	2.769	3.082	7.526
	2	7.307	1.077	11.96
	3	2.708	1.792	9.384
	4	2.116	1.728	3.54
	5	0.917	5.426	7.38
	6	2.344	4.485	10.203
Region 3
	ROI	Area	SD	Integrated Density		MT/DB	Normalized to KCl
DiBAC (DB)	1	13	3.339	33.557		0.482433	1.21338
	2	14.667	3.287	42.446		0.402676	1.01278
	3	18.667	3.802	59.26		0.522967	1.31533
	4	23.639	8.694	195.533		0.339569	0.854061
	5	26.25	1.708	33.591		0.374386	0.941629
	6	31.333	3.525	72.286		0.444913	1.11901
	7	53	2.363	105.218		0.967886	2.43436
	8	42.611	2.055	65.102		0.577217	1.45178
Mitotracker (MT)	1	13	1.195	16.189
	2	14.667	1.642	17.092
	3	18.667	2.022	30.991
	4	23.639	3.901	66.397
	5	26.25	0.721	12.576
	6	31.333	1.804	32.161
	7	53	2.318	101.839
	8	42.611	0.971	37.578

## Sheet: Mouse 2 Left+KCl
	ROI	Area	SD	Integrated Density	MT/DB	Mean MT/DB KCl
DiBAC (DB)	1	46.083	5.84	356.593	0.336398	0.397594
	2	41.958	3.417	177.003	0.566821
	3	78.375	7.75	812.024	0.289563
Mitotracker (MT)	1	46.083	2.042	119.957
	2	41.958	2.473	100.329
	3	78.375	3.887	235.132

## Sheet: Mouse 2 Right
Region 1
	ROI	Area	SD	Integrated Density		MT/DB	Normalized to KCl	Mean MT/DB KCl
DB	1	23.958	1.843	34.743		1.45641	2.07384	0.702276
	2	19.583	3.394	46.011		1.17009	1.66614
	3	16.625	1.465	9.995		1.35418	1.92827
	4	9.25	1.178	5.609		5.32341	7.58023
	5	17.951	1.032	9.955		1.11231	1.58386
MT	1	23.958	3.451	50.6
	2	19.583	4.186	53.837
	3	16.625	1.902	13.535
	4	9.25	4.778	29.859
	5	17.951	2.539	11.073
Region 2
	ROI	Area	SD	Integrated Density		MT/DB	Normalized to KCl
DB	1	9.444	5.202	85.663		0.423894	0.6036
	2	12.222	5.258	76.128		0.989518	1.40902
	3	15.111	5.814	123.169		0.666174	0.948594
	4	4.407	6.215	35.316		1.02885	1.46503
	5	7.099	5.77	52.817		0.618248	0.88035
	6	14.259	5.513	103.032		0.387152	0.551282
MT	1	9.444	2.708	36.312
	2	12.222	7.815	75.33
	3	15.111	5.149	82.052
	4	4.407	8.95	36.335
	5	7.099	3.289	32.654
	6	14.259	2.748	39.889
Region 3
	ROI	Area	SD	Integrated Density		MT/DB
DB	1	35.822	4.535	156.327		0.159294	0.226826
	2	13.869	3.772	72.84		0.602375	0.857748
	3	5.639	4.459	35.756		0.208916	0.297484
	4	19.925	4.587	85.187		0.618498	0.880706
MT	1	35.822	1.086	24.902
	2	13.869	6.148	43.877
	3	5.639	1.919	7.47
	4	19.925	6.056	52.688

## Sheet: Mouse 2 Right+KCl
Region 1
		Area	SD	Integrated Density		MT/DB		Mean Mt/Db KCl
DB	1	49.951	7.144	336.803		1.61463		0.702276
	2	65.901	2.732	126.663		1.17177
	3	39.383	9.631	285.66		1.01499
MT	1	49.951	15.662	543.813
	2	65.901	3.459	148.42
	3	39.383	13.695	289.942
Region 2
DB	1	16.361	14.283	183.204		0.275114
	2	22.5	9.636	175.759		0.383758
	3	17.5	11.284	193.586		0.509195
MT	1	16.361	4.721	50.402
	2	22.5	4.856	67.449
	3	17.5	7.402	98.573
Region 3
DB	1	41.733	7.469	313.939		0.499215
	2	43.856	10.765	472.893		0.606084
	3	50.266	5.283	222.151		0.24572
MT	1	41.733	5.874	156.723
	2	43.856	10.769	286.613
	3	50.266	1.644	54.587
