# Supplementary material for: The Yin and Yang of Breast Cancer: Ion Channels as Determinants of Left-Right Functional Differences
Source: Preprints.org preprint supplement (doi:10.20944/preprints202305.1160.v1), 2023-05-16
Supplement: Supplementary file 2 [file SupFile1B.xlsx]

## Sheet: Mouse 3 Left
Region 1
PROBE	ROI	Area	SD	Integrated Density		MT/DB	Normalized to KCl	Mt/Db KCl
DB	1	25.188	9.392	284.246		0.338411	0.256235	1.32071
	2	29.6	5.036	146.736		0.251547	0.190464
	3	70.525	7.447	558.552		0.396575	0.300275
	4	37.782	5.292	245.573		0.244685	0.185268
	5	32.861	11.181	414.043		0.270262	0.204634
MT	1	25.188	4.124	96.192
	2	29.6	2.065	36.911
	3	70.525	4.179	221.508
	4	37.782	2.528	60.088
	5	32.861	4.224	111.9
Region 2 and 3
PROBE	ROI	Area	SD	Integrated Density		MT/DB	Normalized to KCl	Mt/Db KCl
DB	1	8.394	6.406	57.965		0.124213	0.0940502	1.32071
	2	15.481	5.152	111.322		0.293931	0.222556
	3	14.95	5.552	118.515		0.484496	0.366845
	4	27.25	5.438	136.088		0.198063	0.149967
	5	12.821	5.027	67.486		0.378004	0.286213
MT	1	8.394	1.022	7.2
	2	15.481	2.124	32.721
	3	14.95	2.953	57.42
	4	27.25	1.683	26.954
	5	12.821	2.511	25.51
Region 4
PROBE	ROI	Area	SD	Integrated Density		MT/DB	Normalized to KCl	Mt/Db KCl
DB	1	21.005	7.819	238.604		0.318578	0.241218	1.32071
	2	23.487	10.199	318.293		0.449174	0.340101
	3	4.59	6.452	45.655		1.16706	0.88366
	4	14.946	4.391	71.192		0.962468	0.728751
	5	27.853	8.48	327.066		0.385745	0.292074
MT	1	21.005	3.575	76.014
	2	23.487	5.493	142.969
	3	4.59	9.323	53.282
	4	14.946	4.121	68.52
	5	27.853	4.134	126.164

## Sheet: Mouse 3 Left+KCl
REGION 1
PROBE	ROI	Area	SD	Integrated Density		MT/DB		Mean Mt/Db
DB	1	34.222	12.879	729.867		0.716831		1.32071
	2	92.694	13.441	1350.37		1.27937
	3	56.438	10.446	768.875		0.601606
MT	1	34.222	15.23	523.191
	2	92.694	16.356	1727.62
	3	56.438	17.231	462.56
REGION 2
PROBE	ROI	Area	SD	Integrated Density		MT/DB
DB	1	57.938	10.101	507.479		0.631321
	2	34.979	6.549	254.053		1.05004
	3	105.188	4.577	429.824		1.47223
MT	1	57.938	3.165	320.382
	2	34.979	5.841	266.767
	3	105.188	4.316	632.799
REGION 3
PROBE	ROI	Area	SD	Integrated Density		MT/DB
DB	1	45.75	3.19	71.657		5.40122
	2	60.319	19.752	2149.68		0.24215
	3	31.944	17.984	939.729		0.491608
MT	1	45.75	5.981	387.035
	2	60.319	6.642	520.544
	3	31.944	15.599	461.978

## Sheet: Mouse 3 Right
Region 1
PROBE	ROI	Area	SD	Integrated Density		Mt/Db	Normalized to KCl	Mt/Db KCl
DB	1	68.212	3.543	292.506		0.687511	1.20097	0.572461
	2	72.756	3.822	289.42		0.509637	0.890255
	3	39.611	3.016	138.53		0.643543	1.12417
	4	9.787	2.442	27.394		1.0955	1.91366
MT	1	68.212	2.618	201.101
	2	72.756	2.35	147.499
	3	39.611	2.065	89.15
	4	9.787	2.435	30.01
Region 2
PROBE	ROI	Area	SD	Integrated Density		Mt/Db	Normalized to KCl	Mt/Db KCl
DB	1	38.901	5.897	383.449		0.403819	0.231171	0.572461
	2	26.264	6.824	336.3		0.334264	0.191353
	3	26.752	4.373	177.363		0.303412	0.173691
	4	22.356	4.39	143.762		0.44918	0.257138
	5	38.975	4.214	238.583		0.199603	0.114265
MT	1	38.901	4.835	154.844
	2	26.264	3.218	112.413
	3	26.752	2.44	53.814
	4	22.356	3.371	64.575
	5	38.975	1.413	47.622
Region 3
PROBE	ROI	Area	SD	Integrated Density		Mt/Db	Normalized to KCl	Mt/Db KCl
DB	1	90.859	3.204	241.242		0.517833	0.904573	0.572461
	2	34.609	6.013	219.931		0.274454	0.479429
	3	32.9	2.955	87.828		0.235358	0.411133
	4	58.124	4.071	246.484		0.290278	0.507071
	5	41.199	7.253	382.045		0.534963	0.934497
MT	1	90.859	1.753	124.923
	2	34.609	2.092	60.361
	3	32.9	0.849	20.671
	4	58.124	1.892	71.549
	5	41.199	4.517	204.38

## Sheet: Mouse 3 Right+KCl
REGION 1
PROBE	ROI	Area	SD	Integrated Density		MT/DB	Mean Db/Mt KCl
DB	1	17.535	6.195	202.119		1.06748	0.572461
	2	38.573	4.761	216.87		1.2855
	3	25.266	7.075	283.143		0.74562
MT	1	17.535	8.668	215.759
	2	38.573	3.998	278.786
	3	25.266	6.167	211.117
REGION2
PROBE	ROI	Area	SD	Integrated Density		MT/DB
DB	1	15.13	7.844	139.902		0.152285
	2	20.327	3.909	61.044		0.260173
	3	11.667	7.247	88.784		0.179683
MT	1	15.13	1.871	21.305
	2	20.327	0.9	15.882
	3	11.667	1.218	15.953
REGION 3
PROBE	ROI	Area	SD	Integrated Density		MT/DB
DB	1	4.813	8.114	74.505		0.384028
	2	9.406	7.642	151.134		0.766935
	3	7.028	7.729	121.136		0.504606
MT	1	4.813	4.607	28.612
	2	9.406	11.675	115.91
	3	7.028	6.453	61.126
REGION 4
PROBE	ROI	Area	SD	Integrated Density		MT/DB
DB	1	4.099	8.007	89.679		0.420879
	2	6.623	6.684	105.104		0.487888
	3	6.852	8.163	123.196		0.614452
MT	1	4.099	5.303	37.744
	2	6.623	6.143	51.279
	3	6.852	8.073	75.698
