# Supplementary material for: The Yin and Yang of Breast Cancer: Ion Channels as Determinants of Left-Right Functional Differences
Source: Preprints.org preprint supplement (doi:10.20944/preprints202305.1160.v1), 2023-05-16
Supplement: Supplementary file 3 [file SupFile1C.xlsx]

## Sheet: M4LEFT
Region 1 and 2
	ROI	Area	SD	Integrated Density		MT/DB	Normalized to KCl	Mean M4L+KCL
DB	1	131.017	4.254	491.604		0.973851	0.739147	1.31753
	2	172.035	5.861	741.652		2.29868	1.74468
	3	93.997	9.839	947.41		0.787914	0.598022
	4	118.064	6.828	903.837		0.811456	0.61589
	5	96.98	7.231	671.769		0.645183	0.48969
	6	123.92	3.48	425.966		1.34033	1.01731
	7	84.055	4.567	395.249		0.689168	0.523074
	8	159.601	4.154	670.582		1.27691	0.969165
MT	1	131.017	3.643	478.749
	2	172.035	12.907	1704.82
	3	93.997	8.698	746.478
	4	118.064	7.424	733.424
	5	96.98	5.185	433.414
	6	123.92	5.452	570.937
	7	84.055	3.221	272.393
	8	159.601	5.416	856.271
Region 3
	ROI	Area	SD	Integrated Density		MT/DB	Normalized to KCl	Mean M4L+KCL
DB	1	6.493	8.205	83.14		0.579529	0.439859	1.31753
	2	6.351	5.016	37.034		0.55873	0.424072
	3	14.028	5.437	121.634		0.659495	0.500553
MT	1	6.493	7.399	48.182
	2	6.351	2.79	20.692
	3	14.028	4.136	80.217

## Sheet: M4LEFT+KCl
Region 1
PROBE	ROI	Area	SD	Integrated Density		MT/DB	Mean M4L+KCL
DB	1	32.104	15.053	795.405		0.622748	1.31753
	2	54.375	5.164	455.605		2.50091
	3	44.479	7.194	409.959		2.36059
MT	1	32.104	12.439	495.337
	2	54.375	8.656	1139.43
	3	44.479	10.721	967.744
Region 2
PROBE	ROI	Area	SD	Integrated Density		MT/DB
DB	1	37.365	16.135	508.651		0.438436
	2	91.286	6.739	564.588		1.46633
	3	97.705	9.925	798.572		1.06236
	4	108.824	9.863	578.517		1.02703
MT	1	37.365	4.875	223.011
	2	91.286	7.151	827.871
	3	97.705	5.972	848.373
	4	108.824	5.849	594.156
Region 3
PROBE	ROI	Area	SD	Integrated Density		MT/DB
DB	1	14.34	6.057	105.096		0.958381
	2	18.438	4.289	87.849		1.98973
	3	24.063	5.623	84.793		0.533299
	4	47.729	0.845	15.598		0.762405
MT	1	14.34	6.795	100.722
	2	18.438	7.791	174.796
	3	24.063	3.705	45.22
	4	47.729	0.88	11.892
Region 4
PROBE	ROI	Area	SD	Integrated Density		MT/DB
DB	1	24.486	10.317	423.482		0.738362
	2	36.417	2.748	97.328		2.89287
	3	58.299	8.512	419.684		1.09202
MT	1	24.486	11.986	312.683
	2	36.417	5.647	281.557
	3	58.299	8.35	458.303

## Sheet: M4 RIGHT
Region 1
PROBE	ROI	Area	SD	Integrated Density		MT/DB	Normalized to KCl	Mean M4R+KCL
DB	1	39.259	4.805	179.732		1.74327	1.03552	1.68348
	2	49.75	5.391	165.149		2.13837	1.27021
	3	14.167	4.66	69.793		1.2991	0.771675
MT	1	39.259	5.858	313.322
	2	49.75	3.936	353.15
	3	14.167	4.205	90.668
Region 2
	ROI	Area	SD	Integrated Density		MT/DB	Normalized to KCl
DB	1	18.528	5.787	131.479		0.634033	0.376621
	2	26.208	4	140.757		1.42772	0.848075
	3	32.063	3.119	111.839		1.53277	0.910475
MT	1	18.528	3.41	83.362
	2	26.208	5.489	200.961
	3	32.063	6.44	171.423
Region 3	ROI	Area	SD	Integrated Density		MT/DB	Normalized to KCl
DB	1	25.926	4.478	99.913		0.648124	0.384991
	2	46.093	1.862	47.294		1.87601	1.11437
	3	17.58	3.638	80.992		1.63643	0.972055
MT	1	25.926	2.985	64.756
	2	46.093	2.043	88.724
	3	17.58	5.06	132.538

## Sheet: M4 RIGHT+KCL
Region 1
PROBE	ROI	Area	SD	Integrated Density		MT/DB		Mean M4R+KCL
DB	1	43.75	4.43	160.172		3.02735		1.68348
	2	82.049	4.291	347.907		2.51732
	3	53.736	13.862	545.91		1.00741
MT	1	43.75	8.265	484.897
	2	82.049	5.368	875.792
	3	53.736	6.294	549.957
Region 2
PROBE	ROI	Area	SD	Integrated Density		MT/DB
DB	1	38.037	8.761	338.432		0.804218
	2	54.836	7.047	391.252		0.565881
	3	66.272	8.078	493.369		0.480387
MT	1	38.037	5.455	272.173
	2	54.836	3.675	221.402
	3	66.272	3.624	237.008
Region 3
PROBE	ROI	Area	SD	Integrated Density		MT/DB
DB	1	52	4.805	165.145		2.22044
	2	87.5	3.144	279.254		2.79631
	3	95.111	3.54	212.635		1.73199
MT	1	52	4.915	366.695
	2	87.5	5.114	780.881
	3	95.111	3.132	368.281
