# Supplementary material for: The Yin and Yang of Breast Cancer: Ion Channels as Determinants of Left-Right Functional Differences
Source: Preprints.org preprint supplement (doi:10.20944/preprints202305.1160.v1), 2023-05-16
Supplement: Supplementary file 4 [file SupFile1D.xlsx]

## Sheet: Results M5 LEFT
Region 1
PROBE	ROI	Area	SD	Integrated Density		MT/DB	Normalized to KCl	Mean M5L+KCL
DB	1	21.75	6.21	111.104		0.742323	0.323853	2.29216
	2	32.889	2.114	60.825		2.15528	0.940283
	3	24.722	4.829	145.248		0.989934	0.431878
MT	1	21.75	2.522	82.475
	2	32.889	2.549	131.095
	3	24.722	3.896	143.786
Region 2
PROBE	ROI	Area	SD	Integrated Density		MT/DB	Normalized to KCl
DB	1	7.556	4.916	35.608		0.904965	0.394809
	2	3.333	3.685	16.21		1.82153	0.794678
	3	5.41	5.205	38.028		0.812007	0.354254
MT	1	7.556	4.497	32.224
	2	3.333	3.981	29.527
	3	5.41	3.707	30.879
Region 3
PROBE	ROI	Area	SD	Integrated Density		MT/DB	Normalized to KCl
DB	1	22.681	2.268	38.162		0.873251	0.380973
	2	39.444	2.278	46.614		1.16789	0.509514
	3	19.333	3.421	69.767		1.19435	0.521057
MT	1	22.681	1.46	33.325
	2	39.444	1.249	54.44
	3	19.333	2.675	83.326

## Sheet: M5 L+KCL
Region 1
PROBE	ROI	Area	SD	Integrated Density		MT/DB		Mean M5L+KCL
DB	1	7.969	12.906	204.324		1.16915		2.29216
	2	10.448	8.909	199.103		1.05337
	3	25.052	6.804	347.615		0.820313
MT	1	7.969	22.124	238.885
	2	10.448	9.3	209.73
	3	25.052	5.042	285.153
Region 2
PROBE	ROI	Area	SD	Integrated Density		MT/DB
DB	1	11.363	6.904	142.513		0.967435
	2	10.012	16.099	318.468		0.757241
	3	14.896	5.963	115.582		1.13159
	4	13.767	5.279	105.121		1.28416
MT	1	11.363	7.988	137.872
	2	10.012	14.682	241.157
	3	14.896	4.639	130.791
	4	13.767	5.212	134.992
Region 3	DB
PROBE	ROI	Area	SD	Integrated Density		MT/DB
DB	1	37.604	3.734	148.892		4.32558
	2	27.375	2.78	82.166		9.43362
	3	45.736	4.472	179.823		3.60499
MT	1	37.604	18.702	644.045
	2	27.375	25.657	775.123
	3	45.736	19.129	648.26
Region 4	DB
PROBE	ROI	Area	SD	Integrated Density		MT/DB
DB	1	33.5	4.207	215.229		1.39502
	2	71.986	6.544	412.008		1.65146
	3	36.333	4.709	167.149		2.20417
MT	1	33.5	4.689	300.249
	2	71.986	5.522	680.415
	3	36.333	4.029	368.424

## Sheet: M5 R
Region 1
PROBE	ROI	Area	SD	Integrated Density		MT/DB	Normalized to KCl	Mean M5L+KCL
DB	1	28.806	3.153	64.748		0.714339	69.2159	1.03204
	2	29.708	3.001	90.673		0.67524	65.4274
	3	38.938	2.462	96.623		1.20601	116.856
MT	1	28.806	1.724	46.252
	2	29.708	2.22	61.226
	3	38.938	3.441	116.528
Region 2
PROBE	ROI	Area	SD	Integrated Density		MT/DB	Normalized to KCl
DB	1	38.278	6.158	159.807		0.410257	39.7519
	2	46.722	2.647	100.116		0.958268	92.8515
	3	19.833	1.5	18.364		2.13968	207.324
MT	1	38.278	1.894	65.562
	2	46.722	2.003	95.938
	3	19.833	1.709	39.293
Region 4
PROBE	ROI	Area	SD	Integrated Density		MT/DB	Normalized to KCl
DB	1	23.333	6.033	144.543		0.244695	23.7098
	2	33.431	3.375	56.623		0.395899	38.3607
	3	37.285	4.355	94.78		0.277928	26.9298
MT	4	23.333	1.881	35.369
	5	33.431	1.17	22.417
	6	37.285	1.179	26.342

## Sheet: M5R+KCL
Region 1
PROBE	ROI	Area	SD	Integrated Density		MT/DB		Mean M5R+KCL
DB	1	50.167	6.677	351.565		1.36181		1.55111
	2	59.132	4.424	337.88		2.15844
	3	62.694	2.91	176.776		1.63471
MT	1	50.167	6.931	478.765
	2	59.132	5.531	729.294
	3	62.694	2.95	288.977
REGION 2	DB
PROBE	ROI	Area	SD	Integrated Density		MT/DB
DB	1	19.257	7.522	218.737		0.88579
	2	62.333	3.943	171.954		1.58056
	3	23.75	3.715	82.641		1.68533
MT	1	19.257	6.918	193.755
	2	62.333	2.652	271.784
	3	23.75	3.602	139.277
REGION 3	DB
PROBE	ROI	Area	SD	Integrated Density		MT/DB
DB	1	24.292	5.391	165.876		0.307362
	2	50.875	4.546	281.598		0.865812
	3	37.09	6.649	253.462		0.845168
MT	1	24.292	1.819	50.984
	2	50.875	3.98	243.811
	3	37.09	5.599	214.218
REGION 4	DB
PROBE	ROI	Area	SD	Integrated Density		MT/DB
DB	1	32.25	2.377	76.378		0.493362
	2	57.5	2.012	82.878		0.281981
	3	49.583	7.477	331.508		0.284213
MT	1	32.25	1.8	37.682
	2	57.5	0.712	23.37
	3	49.583	2.176	94.219
