# Supplementary material for: The Yin and Yang of Breast Cancer: Ion Channels as Determinants of Left-Right Functional Differences
Source: Preprints.org preprint supplement (doi:10.20944/preprints202305.1160.v1), 2023-05-16
Supplement: Supplementary file 5 [file SupFile2.xlsx]

## Sheet: Mouse 1
Name	Statistic	#Cells
Autofluorescence Left.fcs		10000
AUTO L.fcs/BC cells	43.2	4325
Mean : BL1-A = 20.908967972	20.9				LEFT	RIGHT
Mean : RL1-A = 22.943759918	22.9			DIBAC +	56.46	28.28
Median : BL1-A = 1.0	1			Mitotracker +	73.6	72
Median : RL1-A = 1.0	1			Mitotracker/DiBAC	1.30358	2.54597
AUTO L.fcs/BC cells/Single Cells	75.9	3284
AUTO L.fcs/BC cells/Single Cells/Q1: RL1-A- , BL1-A+	0	0
AUTO L.fcs/BC cells/Single Cells/Q2: RL1-A+ , BL1-A+	0	0
AUTO L.fcs/BC cells/Single Cells/Q3: RL1-A+ , BL1-A-	0.03	1
AUTO L.fcs/BC cells/Single Cells/Q4: RL1-A- , BL1-A-	100	3283
Mouse 1 Left.fcs		10000
Sample.fcs/BC cells	46.1	4610
Mean : BL1-A = 583.776184082	584
Mean : RL1-A = 2554.743408203	2555
Median : BL1-A = 423.314331055	423
Median : RL1-A = 1369.963378906	1370
Sample.fcs/BC cells/Single Cells	81.4	3752
Sample.fcs/BC cells/Single Cells/Q1: RL1-A- , BL1-A+	0.16	6
Sample.fcs/BC cells/Single Cells/Q2: RL1-A+ , BL1-A+	56.3	2112
Sample.fcs/BC cells/Single Cells/Q3: RL1-A+ , BL1-A-	17.3	649
Sample.fcs/BC cells/Single Cells/Q4: RL1-A- , BL1-A-	26.3	985
Autofluorescence Right.fcs		10000
AUTO R.fcs/BC cells	67.5	6748
Mean : BL1-A = 19.853345871	19.9
Mean : RL1-A = 21.219276428	21.2
Median : BL1-A = 1.0	1
Median : RL1-A = 1.0	1
AUTO R.fcs/BC cells/Single Cells	81.8	5522
AUTO R.fcs/BC cells/Single Cells/Q1: RL1-A- , BL1-A+	0	0
AUTO R.fcs/BC cells/Single Cells/Q2: RL1-A+ , BL1-A+	0	0
AUTO R.fcs/BC cells/Single Cells/Q3: RL1-A+ , BL1-A-	0	0
AUTO R.fcs/BC cells/Single Cells/Q4: RL1-A- , BL1-A-	100	5522
Mouse 1 Right.fcs		10000
Sample.fcs/BC cells	68.9	6893
Mean : BL1-A = 348.794708252	349
Mean : RL1-A = 1387.799316406	1388
Median : BL1-A = 161.889694214	162
Median : RL1-A = 622.627868652	623
Sample.fcs/BC cells/Single Cells	84	5793
Sample.fcs/BC cells/Single Cells/Q1: RL1-A- , BL1-A+	0.28	16
Sample.fcs/BC cells/Single Cells/Q2: RL1-A+ , BL1-A+	28	1624
Sample.fcs/BC cells/Single Cells/Q3: RL1-A+ , BL1-A-	44	2550
Sample.fcs/BC cells/Single Cells/Q4: RL1-A- , BL1-A-	27.7	1603

## Sheet: Mouse 4
Name	Statistic	#Cells
Autofluorescence Mouse 4 left.fcs		10000
MDA	97.3	9733
Mean : BL1-A	15.1						M4 LEFT	M4 RIGHT
Mean : RL1-A	17.6					Dibac +	14.75	18.826
Median : BL1-A	1					Mitotracker +	25.5	45.3
Median : RL1-A	1					Mitotracker/DiBAC	1.72881	2.40625
Single Cells	39.6	3857
Q1: RL1-A- , BL1-A+	0.026	1
Q2: RL1-A+ , BL1-A+	0	0
Q3: RL1-A+ , BL1-A-	0	0
Q4: RL1-A- , BL1-A-	100	3856
Mouse 4 Left.fcs		10000
MDA	97.9	9789
Mean : BL1-A	101
Mean : RL1-A	239
Median : BL1-A	55
Median : RL1-A	84
Single Cells	38.7	3793
Q1: RL1-A- , BL1-A+	0.45	17
Q2: RL1-A+ , BL1-A+	14.3	544
Q3: RL1-A+ , BL1-A-	11.2	423
Q4: RL1-A- , BL1-A-	74.1	2809
Autofluorescence Mouse 4 Right.fcs		10000
MDA	98.6	9865
Mean : BL1-A	16.1
Mean : RL1-A	18
Median : BL1-A	1
Median : RL1-A	1
Single Cells	39.1	3862
Q1: RL1-A- , BL1-A+	0	0
Q2: RL1-A+ , BL1-A+	0	0
Q3: RL1-A+ , BL1-A-	0.052	2
Q4: RL1-A- , BL1-A-	99.9	3860
Mouse 4 Right.fcs		10000
MDA	98.4	9841
Mean : BL1-A	111
Mean : RL1-A	353
Median : BL1-A	55.9
Median : RL1-A	159
Single Cells	38.9	3825
Q1: RL1-A- , BL1-A+	0.026	1
Q2: RL1-A+ , BL1-A+	18.8	721
Q3: RL1-A+ , BL1-A-	26.5	1013
Q4: RL1-A- , BL1-A-	54.6	2090

## Sheet: Mouse 5
Name	Statistic	#Cells
Mouse 5 Left.fcs		10000
MDA	96	9597
Mean : BL1-A	104
Mean : RL1-A	324						M5 LEFT	M5 RIGHT
Median : BL1-A	47.1					Dibac +	19.7	12.633
Median : RL1-A	99.1					Mitotracker +	80.3	72.1
Single Cells	43.5	4173				Mitotracker/DiBAC	4.07614	5.70727
Q1: RL1-A- , BL1-A+	0	0
Q2: RL1-A+ , BL1-A+	19.7	822
Q3: RL1-A+ , BL1-A-	17.7	740
Q4: RL1-A- , BL1-A-	62.6	2611
Autofluorescence Mouse 5 Right.fcs		10000
MDA	94.4	9436
Mean : BL1-A	19.3
Mean : RL1-A	20.4
Median : BL1-A	1
Median : RL1-A	1
Single Cells	62.7	5916
Q1: RL1-A- , BL1-A+	0	0
Q2: RL1-A+ , BL1-A+	0	0
Q3: RL1-A+ , BL1-A-	0.034	2
Q4: RL1-A- , BL1-A-	100	5914
Mouse 5 Right.fcs		10000
MDA	94.9	9490
Mean : BL1-A	131
Mean : RL1-A	845
Median : BL1-A	84
Median : RL1-A	404
Single Cells	64.4	6116
Q1: RL1-A- , BL1-A+	0.033	2
Q2: RL1-A+ , BL1-A+	12.6	770
Q3: RL1-A+ , BL1-A-	59.5	3640
Q4: RL1-A- , BL1-A-	27.9	1704
