# Supplementary material for: The Yin and Yang of Breast Cancer: Ion Channels as Determinants of Left-Right Functional Differences
Source: Preprints.org preprint supplement (doi:10.20944/preprints202305.1160.v1), 2023-05-16
Supplement: Supplementary file 6 [file SupFile3.xlsx]

## Sheet: 6-ICH sign expression
sample	sample_type	Side	6-ICH signature expression
TCGA-A1-A0SK-01	Primary Tumor	RIGHT	55.42
TCGA-A2-A4S0-01	Primary Tumor	RIGHT	52.58
TCGA-BH-A0E9-01	Primary Tumor	RIGHT	51.96
TCGA-AO-A12B-01	Primary Tumor	RIGHT	51.2
TCGA-E9-A3Q9-01	Primary Tumor	RIGHT	51.1
TCGA-BH-A1FR-01	Primary Tumor	RIGHT	50.56
TCGA-EW-A1OX-01	Primary Tumor	RIGHT	50.24
TCGA-D8-A1XG-01	Primary Tumor	RIGHT	49.9
TCGA-A2-A4RY-01	Primary Tumor	RIGHT	49.86
TCGA-E9-A1N3-01	Primary Tumor	RIGHT	49.69
TCGA-A7-A3J0-01	Primary Tumor	RIGHT	49.6
TCGA-A2-A3KD-01	Primary Tumor	RIGHT	49.59
TCGA-A2-A0CO-01	Primary Tumor	RIGHT	49.4
TCGA-A2-A0EW-01	Primary Tumor	RIGHT	49.25
TCGA-HN-A2OB-01	Primary Tumor	RIGHT	48.89
TCGA-GM-A3XG-01	Primary Tumor	RIGHT	48.88
TCGA-BH-A28O-01	Primary Tumor	RIGHT	48.37
TCGA-AO-A0JG-01	Primary Tumor	RIGHT	47.77
TCGA-D8-A145-01	Primary Tumor	RIGHT	47.39
TCGA-E9-A5UO-01	Primary Tumor	RIGHT	47.32
TCGA-AR-A2LQ-01	Primary Tumor	RIGHT	47.24
TCGA-E2-A14U-01	Primary Tumor	RIGHT	47.1
TCGA-BH-A1EU-01	Primary Tumor	RIGHT	47.09
TCGA-A8-A0AD-01	Primary Tumor	RIGHT	47.06
TCGA-D8-A27I-01	Primary Tumor	RIGHT	47.03
TCGA-AR-A2LN-01	Primary Tumor	RIGHT	47.01
TCGA-OL-A5RV-01	Primary Tumor	RIGHT	46.97
TCGA-B6-A1KI-01	Primary Tumor	RIGHT	46.92
TCGA-D8-A1XC-01	Primary Tumor	RIGHT	46.86
TCGA-B6-A0RQ-01	Primary Tumor	RIGHT	46.82
TCGA-LD-A7W6-01	Primary Tumor	RIGHT	46.73
TCGA-A7-A426-01	Primary Tumor	RIGHT	46.72
TCGA-A7-A4SC-01	Primary Tumor	RIGHT	46.69
TCGA-AR-A1AM-01	Primary Tumor	RIGHT	46.63
TCGA-AC-A8OS-01	Primary Tumor	RIGHT	46.62
TCGA-GI-A2C8-01	Primary Tumor	RIGHT	46.5
TCGA-A2-A1G4-01	Primary Tumor	RIGHT	46.4
TCGA-A7-A0CG-01	Primary Tumor	RIGHT	46.28
TCGA-E9-A1RD-01	Primary Tumor	RIGHT	46.25
TCGA-LD-A74U-01	Primary Tumor	RIGHT	46.16
TCGA-A2-A1G6-01	Primary Tumor	RIGHT	46.12
TCGA-AR-A24W-01	Primary Tumor	RIGHT	46.12
TCGA-AN-A0FS-01	Primary Tumor	RIGHT	46.03
TCGA-AR-A1AK-01	Primary Tumor	RIGHT	45.9
TCGA-AC-A3W7-01	Primary Tumor	RIGHT	45.89
TCGA-C8-A3M8-01	Primary Tumor	RIGHT	45.89
TCGA-B6-A0RV-01	Primary Tumor	RIGHT	45.83
TCGA-AC-A2QI-01	Primary Tumor	RIGHT	45.81
TCGA-AC-A3W6-01	Primary Tumor	RIGHT	45.69
TCGA-BH-A18S-01	Primary Tumor	RIGHT	45.69
TCGA-A2-A3KC-01	Primary Tumor	RIGHT	45.57
TCGA-C8-A27A-01	Primary Tumor	RIGHT	45.55
TCGA-D8-A4Z1-01	Primary Tumor	RIGHT	45.52
TCGA-D8-A1XV-01	Primary Tumor	RIGHT	45.48
TCGA-A2-A0YI-01	Primary Tumor	RIGHT	45.34
TCGA-AC-A2FF-01	Primary Tumor	RIGHT	45.31
TCGA-OL-A66J-01	Primary Tumor	RIGHT	45.25
TCGA-E2-A1IU-01	Primary Tumor	RIGHT	45.17
TCGA-D8-A1JI-01	Primary Tumor	RIGHT	45.15
TCGA-E2-A15P-01	Primary Tumor	RIGHT	45.15
TCGA-AR-A24T-01	Primary Tumor	RIGHT	45.11
TCGA-A2-A0T7-01	Primary Tumor	RIGHT	45.09
TCGA-BH-A0HO-01	Primary Tumor	RIGHT	45.08
TCGA-D8-A146-01	Primary Tumor	RIGHT	45.05
TCGA-D8-A3Z5-01	Primary Tumor	RIGHT	44.98
TCGA-BH-A0HI-01	Primary Tumor	RIGHT	44.97
TCGA-B6-A0IN-01	Primary Tumor	RIGHT	44.87
TCGA-E2-A1IG-01	Primary Tumor	RIGHT	44.79
TCGA-OL-A66K-01	Primary Tumor	RIGHT	44.79
TCGA-A2-A0ER-01	Primary Tumor	RIGHT	44.78
TCGA-BH-A0DI-01	Primary Tumor	RIGHT	44.74
TCGA-BH-A1FB-01	Primary Tumor	RIGHT	44.7
TCGA-C8-A1HI-01	Primary Tumor	RIGHT	44.61
TCGA-AO-A0J3-01	Primary Tumor	RIGHT	44.54
TCGA-E2-A1IJ-01	Primary Tumor	RIGHT	44.51
TCGA-E2-A15R-01	Primary Tumor	RIGHT	44.49
TCGA-BH-A1FJ-01	Primary Tumor	RIGHT	44.48
TCGA-BH-A0BM-01	Primary Tumor	RIGHT	44.43
TCGA-BH-A0HF-01	Primary Tumor	RIGHT	44.42
TCGA-AC-A3YI-01	Primary Tumor	RIGHT	44.25
TCGA-AN-A0FN-01	Primary Tumor	RIGHT	44.23
TCGA-A7-A3IY-01	Primary Tumor	RIGHT	44.15
TCGA-EW-A1J2-01	Primary Tumor	RIGHT	44.12
TCGA-BH-A42U-01	Primary Tumor	RIGHT	44.1
TCGA-A2-A0T3-01	Primary Tumor	RIGHT	44.08
TCGA-BH-A0HL-01	Primary Tumor	RIGHT	44.06
TCGA-OL-A6VR-01	Primary Tumor	RIGHT	43.99
TCGA-A2-A0YC-01	Primary Tumor	RIGHT	43.97
TCGA-A8-A09V-01	Primary Tumor	RIGHT	43.93
TCGA-AC-A23G-01	Primary Tumor	RIGHT	43.87
TCGA-A7-A3IZ-01	Primary Tumor	RIGHT	43.86
TCGA-A8-A099-01	Primary Tumor	RIGHT	43.86
TCGA-BH-A0BC-01	Primary Tumor	RIGHT	43.85
TCGA-D8-A1JB-01	Primary Tumor	RIGHT	43.82
TCGA-E2-A3DX-01	Primary Tumor	RIGHT	43.82
TCGA-EW-A1PF-01	Primary Tumor	RIGHT	43.82
TCGA-B6-A1KC-01	Primary Tumor	RIGHT	43.8
TCGA-BH-A0EI-01	Primary Tumor	RIGHT	43.77
TCGA-D8-A73W-01	Primary Tumor	RIGHT	43.77
TCGA-A7-A13H-01	Primary Tumor	RIGHT	43.75
TCGA-PE-A5DD-01	Primary Tumor	RIGHT	43.73
TCGA-OL-A66H-01	Primary Tumor	RIGHT	43.66
TCGA-D8-A27V-01	Primary Tumor	RIGHT	43.64
TCGA-B6-A0X7-01	Primary Tumor	RIGHT	43.62
TCGA-E2-A1BC-01	Primary Tumor	RIGHT	43.61
TCGA-AR-A1AU-01	Primary Tumor	RIGHT	43.58
TCGA-AO-A0J5-01	Primary Tumor	RIGHT	43.54
TCGA-D8-A1X7-01	Primary Tumor	RIGHT	43.54
TCGA-OL-A6VQ-01	Primary Tumor	RIGHT	43.44
TCGA-A7-A425-01	Primary Tumor	RIGHT	43.43
TCGA-AR-A2LM-01	Primary Tumor	RIGHT	43.42
TCGA-AO-A0JA-01	Primary Tumor	RIGHT	43.37
TCGA-C8-A8HR-01	Primary Tumor	RIGHT	43.37
TCGA-D8-A13Y-01	Primary Tumor	RIGHT	43.37
TCGA-A2-A0T4-01	Primary Tumor	RIGHT	43.36
TCGA-PL-A8LY-01	Primary Tumor	RIGHT	43.25
TCGA-C8-A1HE-01	Primary Tumor	RIGHT	43.21
TCGA-AO-A12A-01	Primary Tumor	RIGHT	43.17
TCGA-AC-A2FM-01	Primary Tumor	RIGHT	43.16
TCGA-PE-A5DC-01	Primary Tumor	RIGHT	43.16
TCGA-A2-A0CP-01	Primary Tumor	RIGHT	43.14
TCGA-BH-A0AZ-01	Primary Tumor	RIGHT	43.13
TCGA-BH-A0HA-01	Primary Tumor	RIGHT	43.13
TCGA-E2-A107-01	Primary Tumor	RIGHT	43.01
TCGA-E2-A1IO-01	Primary Tumor	RIGHT	42.99
TCGA-AC-A6IV-01	Primary Tumor	RIGHT	42.93
TCGA-A2-A4RW-01	Primary Tumor	RIGHT	42.87
TCGA-AC-A2QH-01	Primary Tumor	RIGHT	42.82
TCGA-AC-A8OP-01	Primary Tumor	RIGHT	42.82
TCGA-GM-A2DA-01	Primary Tumor	RIGHT	42.82
TCGA-E2-A1IE-01	Primary Tumor	RIGHT	42.76
TCGA-A2-A0EM-01	Primary Tumor	RIGHT	42.74
TCGA-BH-A0DQ-01	Primary Tumor	RIGHT	42.69
TCGA-EW-A424-01	Primary Tumor	RIGHT	42.67
TCGA-A2-A0CK-01	Primary Tumor	RIGHT	42.66
TCGA-AC-A3BB-01	Primary Tumor	RIGHT	42.62
TCGA-AR-A255-01	Primary Tumor	RIGHT	42.57
TCGA-AN-A0FK-01	Primary Tumor	RIGHT	42.54
TCGA-A2-A0YF-01	Primary Tumor	RIGHT	42.53
TCGA-A2-A0CU-01	Primary Tumor	RIGHT	42.47
TCGA-AC-A4ZE-01	Primary Tumor	RIGHT	42.47
TCGA-AN-A0XV-01	Primary Tumor	RIGHT	42.46
TCGA-A8-A093-01	Primary Tumor	RIGHT	42.43
TCGA-AR-A2LE-01	Primary Tumor	RIGHT	42.43
TCGA-E2-A15M-01	Primary Tumor	RIGHT	42.41
TCGA-BH-A0B1-01	Primary Tumor	RIGHT	42.39
TCGA-E9-A229-01	Primary Tumor	RIGHT	42.38
TCGA-E2-A56Z-01	Primary Tumor	RIGHT	42.36
TCGA-E9-A1N9-01	Primary Tumor	RIGHT	42.36
TCGA-XX-A899-01	Primary Tumor	RIGHT	42.35
TCGA-D8-A27P-01	Primary Tumor	RIGHT	42.25
TCGA-LQ-A4E4-01	Primary Tumor	RIGHT	42.21
TCGA-B6-A0IB-01	Primary Tumor	RIGHT	42.18
TCGA-A8-A086-01	Primary Tumor	RIGHT	42.17
TCGA-E9-A295-01	Primary Tumor	RIGHT	42.08
TCGA-BH-A0C1-01	Primary Tumor	RIGHT	42.04
TCGA-BH-A0B8-01	Primary Tumor	RIGHT	42.03
TCGA-BH-A28Q-01	Primary Tumor	RIGHT	42
TCGA-AN-A0XP-01	Primary Tumor	RIGHT	41.99
TCGA-BH-A0BV-01	Primary Tumor	RIGHT	41.99
TCGA-BH-A0DP-01	Primary Tumor	RIGHT	41.99
TCGA-AO-A12E-01	Primary Tumor	RIGHT	41.98
TCGA-OL-A5DA-01	Primary Tumor	RIGHT	41.94
TCGA-S3-AA17-01	Primary Tumor	RIGHT	41.91
TCGA-OL-A5RX-01	Primary Tumor	RIGHT	41.89
TCGA-A2-A3XW-01	Primary Tumor	RIGHT	41.88
TCGA-EW-A1IX-01	Primary Tumor	RIGHT	41.88
TCGA-A8-A08O-01	Primary Tumor	RIGHT	41.82
TCGA-D8-A27T-01	Primary Tumor	RIGHT	41.81
TCGA-GM-A2DC-01	Primary Tumor	RIGHT	41.81
TCGA-AR-A24L-01	Primary Tumor	RIGHT	41.79
TCGA-E2-A1L7-01	Primary Tumor	RIGHT	41.77
TCGA-S3-AA14-01	Primary Tumor	RIGHT	41.71
TCGA-GM-A2DH-01	Primary Tumor	RIGHT	41.7
TCGA-AO-A12G-01	Primary Tumor	RIGHT	41.67
TCGA-EW-A1P3-01	Primary Tumor	RIGHT	41.66
TCGA-E9-A5FK-01	Primary Tumor	RIGHT	41.64
TCGA-A2-A0CZ-01	Primary Tumor	RIGHT	41.63
TCGA-D8-A1JH-01	Primary Tumor	RIGHT	41.63
TCGA-A2-A1FZ-01	Primary Tumor	RIGHT	41.57
TCGA-D8-A1XB-01	Primary Tumor	RIGHT	41.56
TCGA-E2-A106-01	Primary Tumor	RIGHT	41.54
TCGA-A8-A0A2-01	Primary Tumor	RIGHT	41.51
TCGA-AC-A3TN-01	Primary Tumor	RIGHT	41.49
TCGA-A8-A091-01	Primary Tumor	RIGHT	41.48
TCGA-BH-A0DG-01	Primary Tumor	RIGHT	41.44
TCGA-EW-A1IW-01	Primary Tumor	RIGHT	41.41
TCGA-E2-A1IH-01	Primary Tumor	RIGHT	41.35
TCGA-AR-A2LH-01	Primary Tumor	RIGHT	41.12
TCGA-S3-AA11-01	Primary Tumor	RIGHT	41.12
TCGA-A2-A0EP-01	Primary Tumor	RIGHT	41.11
TCGA-OK-A5Q2-01	Primary Tumor	RIGHT	41.06
TCGA-A2-A1FX-01	Primary Tumor	RIGHT	41.03
TCGA-AC-A3YJ-01	Primary Tumor	RIGHT	41.03
TCGA-B6-A0I8-01	Primary Tumor	RIGHT	40.97
TCGA-EW-A1P1-01	Primary Tumor	RIGHT	40.96
TCGA-BH-A0H7-01	Primary Tumor	RIGHT	40.95
TCGA-AR-A2LR-01	Primary Tumor	RIGHT	40.94
TCGA-E2-A109-01	Primary Tumor	RIGHT	40.9
TCGA-A7-A0DB-01	Primary Tumor	RIGHT	40.88
TCGA-LL-A441-01	Primary Tumor	RIGHT	40.87
TCGA-E9-A24A-01	Primary Tumor	RIGHT	40.84
TCGA-D8-A1XM-01	Primary Tumor	RIGHT	40.81
TCGA-3C-AALJ-01	Primary Tumor	RIGHT	40.8
TCGA-E2-A108-01	Primary Tumor	RIGHT	40.77
TCGA-BH-A0EB-01	Primary Tumor	RIGHT	40.75
TCGA-AC-A2B8-01	Primary Tumor	RIGHT	40.74
TCGA-B6-A0RO-01	Primary Tumor	RIGHT	40.71
TCGA-AR-A1AN-01	Primary Tumor	RIGHT	40.66
TCGA-LD-A66U-01	Primary Tumor	RIGHT	40.66
TCGA-5L-AAT0-01	Primary Tumor	RIGHT	40.63
TCGA-AQ-A1H3-01	Primary Tumor	RIGHT	40.57
TCGA-A2-A04N-01	Primary Tumor	RIGHT	40.56
TCGA-E2-A15D-01	Primary Tumor	RIGHT	40.55
TCGA-A7-A5ZW-01	Primary Tumor	RIGHT	40.51
TCGA-B6-A2IU-01	Primary Tumor	RIGHT	40.41
TCGA-C8-A26Z-01	Primary Tumor	RIGHT	40.41
TCGA-BH-A0B2-01	Primary Tumor	RIGHT	40.38
TCGA-D8-A27L-01	Primary Tumor	RIGHT	40.32
TCGA-EW-A1J1-01	Primary Tumor	RIGHT	40.29
TCGA-A2-A0CL-01	Primary Tumor	RIGHT	40.25
TCGA-A1-A0SG-01	Primary Tumor	RIGHT	40.16
TCGA-BH-A0H0-01	Primary Tumor	RIGHT	40.13
TCGA-OL-A66L-01	Primary Tumor	RIGHT	40.12
TCGA-E9-A22B-01	Primary Tumor	RIGHT	40.11
TCGA-AC-A3QP-01	Primary Tumor	RIGHT	40.09
TCGA-AC-A62Y-01	Primary Tumor	RIGHT	40.06
TCGA-A7-A4SB-01	Primary Tumor	RIGHT	40.05
TCGA-BH-A18F-01	Primary Tumor	RIGHT	40.05
TCGA-AC-A2FE-01	Primary Tumor	RIGHT	40.03
TCGA-EW-A1IY-01	Primary Tumor	RIGHT	40
TCGA-A2-A4S2-01	Primary Tumor	RIGHT	39.98
TCGA-E2-A1IN-01	Primary Tumor	RIGHT	39.98
TCGA-GM-A2DO-01	Primary Tumor	RIGHT	39.97
TCGA-BH-A18H-01	Primary Tumor	RIGHT	39.87
TCGA-AO-A0J8-01	Primary Tumor	RIGHT	39.85
TCGA-A1-A0SI-01	Primary Tumor	RIGHT	39.8
TCGA-AO-A0J9-01	Primary Tumor	RIGHT	39.8
TCGA-S3-AA15-01	Primary Tumor	RIGHT	39.78
TCGA-BH-A1ES-01	Primary Tumor	RIGHT	39.74
TCGA-A2-A0CQ-01	Primary Tumor	RIGHT	39.72
TCGA-AR-A0TQ-01	Primary Tumor	RIGHT	39.72
TCGA-E2-A1BD-01	Primary Tumor	RIGHT	39.68
TCGA-E9-A228-01	Primary Tumor	RIGHT	39.65
TCGA-B6-A0RN-01	Primary Tumor	RIGHT	39.63
TCGA-E9-A1NE-01	Primary Tumor	RIGHT	39.59
TCGA-A2-A1FW-01	Primary Tumor	RIGHT	39.47
TCGA-EW-A2FW-01	Primary Tumor	RIGHT	39.47
TCGA-AQ-A04J-01	Primary Tumor	RIGHT	39.45
TCGA-B6-A0IC-01	Primary Tumor	RIGHT	39.45
TCGA-BH-A0HK-01	Primary Tumor	RIGHT	39.43
TCGA-AQ-A0Y5-01	Primary Tumor	RIGHT	39.42
TCGA-A8-A09D-01	Primary Tumor	RIGHT	39.38
TCGA-E2-A15C-01	Primary Tumor	RIGHT	39.38
TCGA-BH-A0H6-01	Primary Tumor	RIGHT	39.31
TCGA-AO-A126-01	Primary Tumor	RIGHT	39.28
TCGA-BH-A1FU-01	Primary Tumor	RIGHT	39.24
TCGA-B6-A1KN-01	Primary Tumor	RIGHT	39.23
TCGA-BH-A0B7-01	Primary Tumor	RIGHT	39.16
TCGA-A8-A07G-01	Primary Tumor	RIGHT	39.13
TCGA-BH-A0DT-01	Primary Tumor	RIGHT	39.09
TCGA-AC-A6NO-01	Primary Tumor	RIGHT	39.07
TCGA-A2-A04Y-01	Primary Tumor	RIGHT	39.06
TCGA-A2-A0EN-01	Primary Tumor	RIGHT	39.05
TCGA-AR-A24V-01	Primary Tumor	RIGHT	39.05
TCGA-C8-A1HK-01	Primary Tumor	RIGHT	39
TCGA-D8-A27W-01	Primary Tumor	RIGHT	38.91
TCGA-D8-A1XR-01	Primary Tumor	RIGHT	38.9
TCGA-EW-A1P6-01	Primary Tumor	RIGHT	38.85
TCGA-A8-A081-01	Primary Tumor	RIGHT	38.8
TCGA-A7-A13F-01	Primary Tumor	RIGHT	38.77
TCGA-A8-A09C-01	Primary Tumor	RIGHT	38.77
TCGA-B6-A0RU-01	Primary Tumor	RIGHT	38.74
TCGA-E9-A22E-01	Primary Tumor	RIGHT	38.72
TCGA-A2-A0CT-01	Primary Tumor	RIGHT	38.7
TCGA-GM-A5PV-01	Primary Tumor	RIGHT	38.7
TCGA-AO-A0JC-01	Primary Tumor	RIGHT	38.69
TCGA-AO-A12H-01	Primary Tumor	RIGHT	38.67
TCGA-AR-A24R-01	Primary Tumor	RIGHT	38.59
TCGA-B6-A0IM-01	Primary Tumor	RIGHT	38.59
TCGA-C8-A273-01	Primary Tumor	RIGHT	38.55
TCGA-B6-A0WV-01	Primary Tumor	RIGHT	38.46
TCGA-AC-A3W5-01	Primary Tumor	RIGHT	38.44
TCGA-E9-A1R3-01	Primary Tumor	RIGHT	38.43
TCGA-A8-A06Z-01	Primary Tumor	RIGHT	38.36
TCGA-GM-A2DM-01	Primary Tumor	RIGHT	38.36
TCGA-A8-A06P-01	Primary Tumor	RIGHT	38.3
TCGA-E9-A1NG-01	Primary Tumor	RIGHT	38.3
TCGA-BH-A0H5-01	Primary Tumor	RIGHT	38.25
TCGA-AR-A24S-01	Primary Tumor	RIGHT	38.2
TCGA-AN-A0XN-01	Primary Tumor	RIGHT	38.16
TCGA-GM-A2DD-01	Primary Tumor	RIGHT	38.15
TCGA-AC-A3QQ-01	Primary Tumor	RIGHT	38.1
TCGA-AN-A0FT-01	Primary Tumor	RIGHT	38.07
TCGA-E2-A15L-01	Primary Tumor	RIGHT	38.06
TCGA-A2-A0EY-01	Primary Tumor	RIGHT	38.05
TCGA-AR-A0TY-01	Primary Tumor	RIGHT	38.02
TCGA-BH-A18J-01	Primary Tumor	RIGHT	38.02
TCGA-BH-A1F5-01	Primary Tumor	RIGHT	38
TCGA-AC-A23E-01	Primary Tumor	RIGHT	37.99
TCGA-GM-A2DK-01	Primary Tumor	RIGHT	37.99
TCGA-D8-A1X5-01	Primary Tumor	RIGHT	37.98
TCGA-3C-AALI-01	Primary Tumor	RIGHT	37.88
TCGA-E9-A1R5-01	Primary Tumor	RIGHT	37.87
TCGA-A8-A07J-01	Primary Tumor	RIGHT	37.86
TCGA-AR-A2LK-01	Primary Tumor	RIGHT	37.86
TCGA-A8-A096-01	Primary Tumor	RIGHT	37.81
TCGA-BH-A1EO-01	Primary Tumor	RIGHT	37.79
TCGA-3C-AALK-01	Primary Tumor	RIGHT	37.76
TCGA-E2-A15H-01	Primary Tumor	RIGHT	37.76
TCGA-EW-A1PD-01	Primary Tumor	RIGHT	37.76
TCGA-E2-A152-01	Primary Tumor	RIGHT	37.7
TCGA-A8-A090-01	Primary Tumor	RIGHT	37.64
TCGA-A2-A4RX-01	Primary Tumor	RIGHT	37.62
TCGA-EW-A1J6-01	Primary Tumor	RIGHT	37.62
TCGA-AC-A7VB-01	Primary Tumor	RIGHT	37.61
TCGA-AC-A3TM-01	Primary Tumor	RIGHT	37.6
TCGA-LL-A5YN-01	Primary Tumor	RIGHT	37.57
TCGA-A8-A082-01	Primary Tumor	RIGHT	37.56
TCGA-C8-A12N-01	Primary Tumor	RIGHT	37.56
TCGA-A2-A0SW-01	Primary Tumor	RIGHT	37.53
TCGA-D8-A141-01	Primary Tumor	RIGHT	37.45
TCGA-A8-A08I-01	Primary Tumor	RIGHT	37.43
TCGA-E9-A22A-01	Primary Tumor	RIGHT	37.43
TCGA-AQ-A04L-01	Primary Tumor	RIGHT	37.41
TCGA-B6-A0X0-01	Primary Tumor	RIGHT	37.41
TCGA-B6-A0WZ-01	Primary Tumor	RIGHT	37.37
TCGA-EW-A1P7-01	Primary Tumor	RIGHT	37.36
TCGA-AR-A24X-01	Primary Tumor	RIGHT	37.33
TCGA-BH-A0BL-01	Primary Tumor	RIGHT	37.33
TCGA-A8-A08J-01	Primary Tumor	RIGHT	37.19
TCGA-C8-A274-01	Primary Tumor	RIGHT	37.16
TCGA-E2-A570-01	Primary Tumor	RIGHT	37.16
TCGA-AN-A046-01	Primary Tumor	RIGHT	37.14
TCGA-LL-A6FQ-01	Primary Tumor	RIGHT	37.12
TCGA-A1-A0SP-01	Primary Tumor	RIGHT	37.1
TCGA-BH-A0BT-01	Primary Tumor	RIGHT	37.1
TCGA-A8-A09G-01	Primary Tumor	RIGHT	37.07
TCGA-AC-A3EH-01	Primary Tumor	RIGHT	36.96
TCGA-B6-A0RI-01	Primary Tumor	RIGHT	36.93
TCGA-BH-A0E2-01	Primary Tumor	RIGHT	36.9
TCGA-E9-A1R7-01	Primary Tumor	RIGHT	36.89
TCGA-A7-A2KD-01	Primary Tumor	RIGHT	36.85
TCGA-A2-A0T1-01	Primary Tumor	RIGHT	36.8
TCGA-AO-A03L-01	Primary Tumor	RIGHT	36.77
TCGA-D8-A1Y2-01	Primary Tumor	RIGHT	36.75
TCGA-EW-A2FR-01	Primary Tumor	RIGHT	36.72
TCGA-A2-A04V-01	Primary Tumor	RIGHT	36.63
TCGA-LL-A50Y-01	Primary Tumor	RIGHT	36.61
TCGA-OL-A66O-01	Primary Tumor	RIGHT	36.53
TCGA-E9-A1R6-01	Primary Tumor	RIGHT	36.46
TCGA-EW-A1P5-01	Primary Tumor	RIGHT	36.44
TCGA-S3-A6ZF-01	Primary Tumor	RIGHT	36.43
TCGA-BH-A0H9-01	Primary Tumor	RIGHT	36.38
TCGA-LL-A740-01	Primary Tumor	RIGHT	36.38
TCGA-EW-A1OV-01	Primary Tumor	RIGHT	36.29
TCGA-A8-A08F-01	Primary Tumor	RIGHT	36.28
TCGA-B6-A0I5-01	Primary Tumor	RIGHT	36.26
TCGA-A8-A09N-01	Primary Tumor	RIGHT	36.03
TCGA-BH-A0HU-01	Primary Tumor	RIGHT	36.03
TCGA-A7-A0DC-01	Primary Tumor	RIGHT	35.99
TCGA-E2-A1L9-01	Primary Tumor	RIGHT	35.99
TCGA-C8-A133-01	Primary Tumor	RIGHT	35.96
TCGA-AO-A03P-01	Primary Tumor	RIGHT	35.95
TCGA-A8-A09W-01	Primary Tumor	RIGHT	35.85
TCGA-PL-A8LV-01	Primary Tumor	RIGHT	35.82
TCGA-D8-A1XZ-01	Primary Tumor	RIGHT	35.77
TCGA-D8-A27R-01	Primary Tumor	RIGHT	35.76
TCGA-BH-A0DS-01	Primary Tumor	RIGHT	35.68
TCGA-BH-A203-01	Primary Tumor	RIGHT	35.61
TCGA-AQ-A1H2-01	Primary Tumor	RIGHT	35.59
TCGA-E2-A15K-01	Primary Tumor	RIGHT	35.51
TCGA-OL-A5RY-01	Primary Tumor	RIGHT	35.5
TCGA-E2-A1LE-01	Primary Tumor	RIGHT	35.43
TCGA-BH-A0BF-01	Primary Tumor	RIGHT	35.31
TCGA-AC-A8OQ-01	Primary Tumor	RIGHT	35.29
TCGA-E2-A1LA-01	Primary Tumor	RIGHT	35.27
TCGA-A2-A0EU-01	Primary Tumor	RIGHT	35.24
TCGA-A8-A09M-01	Primary Tumor	RIGHT	35.18
TCGA-A2-A25D-01	Primary Tumor	RIGHT	35.17
TCGA-V7-A7HQ-01	Primary Tumor	RIGHT	35.14
TCGA-LL-A73Y-01	Primary Tumor	RIGHT	35.12
TCGA-A8-A07L-01	Primary Tumor	RIGHT	35.03
TCGA-A8-A08T-01	Primary Tumor	RIGHT	35
TCGA-A2-A0ST-01	Primary Tumor	RIGHT	34.97
TCGA-A8-A0A1-01	Primary Tumor	RIGHT	34.97
TCGA-AN-A0AR-01	Primary Tumor	RIGHT	34.94
TCGA-E2-A14P-01	Primary Tumor	RIGHT	34.85
TCGA-AR-A0TS-01	Primary Tumor	RIGHT	34.81
TCGA-BH-A2L8-01	Primary Tumor	RIGHT	34.81
TCGA-A2-A04W-01	Primary Tumor	RIGHT	34.7
TCGA-AR-A24H-01	Primary Tumor	RIGHT	34.66
TCGA-E9-A22D-01	Primary Tumor	RIGHT	34.59
TCGA-C8-A1HG-01	Primary Tumor	RIGHT	34.56
TCGA-A8-A06U-01	Primary Tumor	RIGHT	34.54
TCGA-D8-A1JM-01	Primary Tumor	RIGHT	34.53
TCGA-EW-A6S9-01	Primary Tumor	RIGHT	34.52
TCGA-LL-A5YL-01	Primary Tumor	RIGHT	34.41
TCGA-C8-A1HJ-01	Primary Tumor	RIGHT	34.38
TCGA-BH-A0HB-01	Primary Tumor	RIGHT	34.36
TCGA-AQ-A54O-01	Primary Tumor	RIGHT	34.34
TCGA-BH-A0DD-01	Primary Tumor	RIGHT	34.33
TCGA-A7-A6VV-01	Primary Tumor	RIGHT	34.22
TCGA-BH-A18R-01	Primary Tumor	RIGHT	34.19
TCGA-A2-A0ET-01	Primary Tumor	RIGHT	34.16
TCGA-D8-A1JG-01	Primary Tumor	RIGHT	34.11
TCGA-E9-A1RC-01	Primary Tumor	RIGHT	34.09
TCGA-E9-A6HE-01	Primary Tumor	RIGHT	33.95
TCGA-A2-A04Q-01	Primary Tumor	RIGHT	33.93
TCGA-E2-A1LS-01	Primary Tumor	RIGHT	33.91
TCGA-AN-A0FV-01	Primary Tumor	RIGHT	33.89
TCGA-C8-A26X-01	Primary Tumor	RIGHT	33.85
TCGA-E9-A1N8-01	Primary Tumor	RIGHT	33.83
TCGA-AO-A0JE-01	Primary Tumor	RIGHT	33.81
TCGA-D8-A27N-01	Primary Tumor	RIGHT	33.8
TCGA-A8-A08B-01	Primary Tumor	RIGHT	33.79
TCGA-E9-A1NF-01	Primary Tumor	RIGHT	33.77
TCGA-AO-A0JM-01	Primary Tumor	RIGHT	33.76
TCGA-BH-A1FN-01	Primary Tumor	RIGHT	33.75
TCGA-AR-A0TT-01	Primary Tumor	RIGHT	33.57
TCGA-BH-A1EN-01	Primary Tumor	RIGHT	33.49
TCGA-E9-A1RG-01	Primary Tumor	RIGHT	33.49
TCGA-OL-A66P-01	Primary Tumor	RIGHT	33.47
TCGA-LL-A6FP-01	Primary Tumor	RIGHT	33.42
TCGA-AC-A62V-01	Primary Tumor	RIGHT	33.39
TCGA-A7-A26G-01	Primary Tumor	RIGHT	33.35
TCGA-D8-A1JS-01	Primary Tumor	RIGHT	33.31
TCGA-A8-A09I-01	Primary Tumor	RIGHT	33.3
TCGA-OL-A5RW-01	Primary Tumor	RIGHT	33.27
TCGA-B6-A0RT-01	Primary Tumor	RIGHT	33.24
TCGA-A1-A0SO-01	Primary Tumor	RIGHT	33.15
TCGA-B6-A0WW-01	Primary Tumor	RIGHT	33.09
TCGA-E9-A248-01	Primary Tumor	RIGHT	32.97
TCGA-A2-A25F-01	Primary Tumor	RIGHT	32.93
TCGA-D8-A13Z-01	Primary Tumor	RIGHT	32.86
TCGA-D8-A147-01	Primary Tumor	RIGHT	32.81
TCGA-A8-A08P-01	Primary Tumor	RIGHT	32.78
TCGA-A8-A07U-01	Primary Tumor	RIGHT	32.66
TCGA-BH-A1EX-01	Primary Tumor	RIGHT	32.63
TCGA-E9-A243-01	Primary Tumor	RIGHT	32.57
TCGA-B6-A0IA-01	Primary Tumor	RIGHT	32.55
TCGA-LL-A8F5-01	Primary Tumor	RIGHT	32.55
TCGA-C8-A26V-01	Primary Tumor	RIGHT	32.53
TCGA-A8-A0A7-01	Primary Tumor	RIGHT	32.49
TCGA-D8-A1JJ-01	Primary Tumor	RIGHT	32.48
TCGA-C8-A12L-01	Primary Tumor	RIGHT	32.44
TCGA-E2-A1LH-01	Primary Tumor	RIGHT	32.4
TCGA-LL-A5YP-01	Primary Tumor	RIGHT	32.37
TCGA-D8-A27F-01	Primary Tumor	RIGHT	32.36
TCGA-A8-A06X-01	Primary Tumor	RIGHT	32.29
TCGA-E9-A1NC-01	Primary Tumor	RIGHT	32.28
TCGA-GI-A2C9-01	Primary Tumor	RIGHT	32.14
TCGA-E9-A5FL-01	Primary Tumor	RIGHT	32.03
TCGA-UL-AAZ6-01	Primary Tumor	RIGHT	31.93
TCGA-E2-A9RU-01	Primary Tumor	RIGHT	31.9
TCGA-E2-A1LB-01	Primary Tumor	RIGHT	31.89
TCGA-C8-A12U-01	Primary Tumor	RIGHT	31.82
TCGA-A8-A06R-01	Primary Tumor	RIGHT	31.67
TCGA-AO-A12F-01	Primary Tumor	RIGHT	31.63
TCGA-C8-A12V-01	Primary Tumor	RIGHT	31.56
TCGA-D8-A27H-01	Primary Tumor	RIGHT	31.38
TCGA-A7-A4SF-01	Primary Tumor	RIGHT	31.25
TCGA-A7-A13D-01	Primary Tumor	RIGHT	31.12
TCGA-EW-A1PH-01	Primary Tumor	RIGHT	31.11
TCGA-BH-A0WA-01	Primary Tumor	RIGHT	31.08
TCGA-D8-A1J8-01	Primary Tumor	RIGHT	31.08
TCGA-AR-A1AQ-01	Primary Tumor	RIGHT	31.03
TCGA-D8-A1XT-01	Primary Tumor	RIGHT	30.94
TCGA-E2-A14X-01	Primary Tumor	RIGHT	30.76
TCGA-E9-A54Y-01	Primary Tumor	RIGHT	30.6
TCGA-A2-A0SV-01	Primary Tumor	RIGHT	30.59
TCGA-AR-A1AJ-01	Primary Tumor	RIGHT	30.57
TCGA-B6-A1KF-01	Primary Tumor	RIGHT	30.44
TCGA-A2-A0CW-01	Primary Tumor	RIGHT	30.2
TCGA-BH-A1FM-01	Primary Tumor	RIGHT	30.15
TCGA-AC-A23H-01	Primary Tumor	RIGHT	30.01
TCGA-AO-A03O-01	Primary Tumor	RIGHT	29.96
TCGA-AO-A1KR-01	Primary Tumor	RIGHT	29.91
TCGA-BH-A0B9-01	Primary Tumor	RIGHT	29.89
TCGA-A7-A4SD-01	Primary Tumor	RIGHT	29.68
TCGA-B6-A402-01	Primary Tumor	RIGHT	29.51
TCGA-A2-A1G1-01	Primary Tumor	RIGHT	29.45
TCGA-A2-A0YE-01	Primary Tumor	RIGHT	29.31
TCGA-E2-A1IP-01	Primary Tumor	RIGHT	29.26
TCGA-C8-A12Z-01	Primary Tumor	RIGHT	29.23
TCGA-BH-A0DZ-01	Primary Tumor	RIGHT	29.09
TCGA-A2-A4S1-01	Primary Tumor	RIGHT	29.05
TCGA-B6-A0IJ-01	Primary Tumor	RIGHT	28.76
TCGA-A7-A6VY-01	Primary Tumor	RIGHT	28.51
TCGA-S3-AA10-01	Primary Tumor	RIGHT	28.39
TCGA-OL-A66I-01	Primary Tumor	RIGHT	28.15
TCGA-B6-A0RE-01	Primary Tumor	RIGHT	28
TCGA-AR-A0TW-01	Primary Tumor	RIGHT	27.55
TCGA-A2-A04U-01	Primary Tumor	RIGHT	27.48
TCGA-BH-A18V-01	Primary Tumor	RIGHT	27.37
TCGA-OL-A5S0-01	Primary Tumor	RIGHT	27.35
TCGA-B6-A409-01	Primary Tumor	RIGHT	27.25
TCGA-OL-A6VO-01	Primary Tumor	RIGHT	27.21
TCGA-BH-A0B3-01	Primary Tumor	RIGHT	26.92
TCGA-E2-A573-01	Primary Tumor	RIGHT	26.91
TCGA-A8-A07C-01	Primary Tumor	RIGHT	26.9
TCGA-AR-A1AH-01	Primary Tumor	RIGHT	26.79
TCGA-A2-A3XV-01	Primary Tumor	RIGHT	26.71
TCGA-A8-A09Z-01	Primary Tumor	RIGHT	26.63
TCGA-D8-A1XQ-01	Primary Tumor	RIGHT	26.63
TCGA-A2-A0T2-01	Primary Tumor	RIGHT	26.51
TCGA-UU-A93S-01	Primary Tumor	RIGHT	26.51
TCGA-E2-A14N-01	Primary Tumor	RIGHT	26.37
TCGA-E9-A1RH-01	Primary Tumor	RIGHT	26.31
TCGA-BH-A18G-01	Primary Tumor	RIGHT	26.18
TCGA-AR-A256-01	Primary Tumor	RIGHT	25.81
TCGA-C8-A12K-01	Primary Tumor	RIGHT	25.46
TCGA-AN-A0AT-01	Primary Tumor	RIGHT	25.4
TCGA-A8-A07O-01	Primary Tumor	RIGHT	25.3
TCGA-AN-A0G0-01	Primary Tumor	RIGHT	25.23
TCGA-D8-A1Y3-01	Primary Tumor	RIGHT	25.18
TCGA-LL-A6FR-01	Primary Tumor	RIGHT	24.51
TCGA-AO-A128-01	Primary Tumor	RIGHT	24.27
TCGA-BH-A0EE-01	Primary Tumor	RIGHT	24.15
TCGA-BH-A1FC-01	Primary Tumor	RIGHT	24.12
TCGA-GM-A3XL-01	Primary Tumor	RIGHT	23.9
TCGA-E2-A14Y-01	Primary Tumor	RIGHT	22.92
TCGA-AR-A0TU-01	Primary Tumor	RIGHT	22.55
TCGA-AR-A5QQ-01	Primary Tumor	RIGHT	22.01
TCGA-EW-A1PB-01	Primary Tumor	RIGHT	21.3
TCGA-BH-A18T-01	Primary Tumor	RIGHT	21
TCGA-E9-A245-01	Primary Tumor	LEFT	53.89
TCGA-B6-A0X4-01	Primary Tumor	LEFT	50.84
TCGA-A1-A0SQ-01	Primary Tumor	LEFT	50.13
TCGA-BH-A0DO-01	Primary Tumor	LEFT	49.1
TCGA-C8-A3M7-01	Primary Tumor	LEFT	49.06
TCGA-PL-A8LX-01	Primary Tumor	LEFT	49.06
TCGA-3C-AAAU-01	Primary Tumor	LEFT	48.52
TCGA-A1-A0SD-01	Primary Tumor	LEFT	48.51
TCGA-A2-A0ES-01	Primary Tumor	LEFT	48.25
TCGA-A7-A3RF-01	Primary Tumor	LEFT	48.23
TCGA-E2-A1IK-01	Primary Tumor	LEFT	47.94
TCGA-A2-A25A-01	Primary Tumor	LEFT	47.92
TCGA-D8-A27E-01	Primary Tumor	LEFT	47.81
TCGA-B6-A0IH-01	Primary Tumor	LEFT	47.67
TCGA-E9-A227-01	Primary Tumor	LEFT	47.65
TCGA-A2-A1FV-01	Primary Tumor	LEFT	47.58
TCGA-BH-A1FH-01	Primary Tumor	LEFT	47.51
TCGA-LL-A440-01	Primary Tumor	LEFT	47.51
TCGA-A8-A0A4-01	Primary Tumor	LEFT	47.5
TCGA-E2-A14Q-01	Primary Tumor	LEFT	47.5
TCGA-B6-A0WY-01	Primary Tumor	LEFT	47.33
TCGA-BH-A0DE-01	Primary Tumor	LEFT	47.22
TCGA-AO-A03T-01	Primary Tumor	LEFT	47.12
TCGA-A7-A5ZX-01	Primary Tumor	LEFT	47.1
TCGA-AC-A2FK-01	Primary Tumor	LEFT	47.09
TCGA-AQ-A7U7-01	Primary Tumor	LEFT	47
TCGA-C8-A1HO-01	Primary Tumor	LEFT	47
TCGA-D8-A1X8-01	Primary Tumor	LEFT	46.94
TCGA-BH-A0HP-01	Primary Tumor	LEFT	46.54
TCGA-AR-A252-01	Primary Tumor	LEFT	46.49
TCGA-AN-A0XL-01	Primary Tumor	LEFT	46.31
TCGA-A2-A0YK-01	Primary Tumor	LEFT	46.29
TCGA-BH-A0EA-01	Primary Tumor	LEFT	46.25
TCGA-E2-A1IL-01	Primary Tumor	LEFT	46.14
TCGA-AC-A3HN-01	Primary Tumor	LEFT	46.09
TCGA-AO-A1KO-01	Primary Tumor	LEFT	46.08
TCGA-W8-A86G-01	Primary Tumor	LEFT	45.84
TCGA-A8-A09B-01	Primary Tumor	LEFT	45.81
TCGA-BH-A201-01	Primary Tumor	LEFT	45.75
TCGA-AR-A24O-01	Primary Tumor	LEFT	45.73
TCGA-B6-A0WT-01	Primary Tumor	LEFT	45.73
TCGA-BH-A0GZ-01	Primary Tumor	LEFT	45.64
TCGA-A7-A3J1-01	Primary Tumor	LEFT	45.6
TCGA-AO-A0JJ-01	Primary Tumor	LEFT	45.47
TCGA-A1-A0SE-01	Primary Tumor	LEFT	45.45
TCGA-GM-A3XN-01	Primary Tumor	LEFT	45.44
TCGA-E2-A1L6-01	Primary Tumor	LEFT	45.41
TCGA-D8-A3Z6-01	Primary Tumor	LEFT	45.39
TCGA-E2-A15E-01	Primary Tumor	LEFT	45.33
TCGA-BH-A42V-01	Primary Tumor	LEFT	45.32
TCGA-BH-A8G0-01	Primary Tumor	LEFT	45.28
TCGA-AR-A1AL-01	Primary Tumor	LEFT	45.19
TCGA-AO-A03V-01	Primary Tumor	LEFT	45.17
TCGA-GM-A4E0-01	Primary Tumor	LEFT	45.13
TCGA-AN-A04A-01	Primary Tumor	LEFT	45.11
TCGA-BH-A0W5-01	Primary Tumor	LEFT	45.06
TCGA-BH-A0DV-01	Primary Tumor	LEFT	45.02
TCGA-AC-A2FG-01	Primary Tumor	LEFT	44.92
TCGA-EW-A1PA-01	Primary Tumor	LEFT	44.92
TCGA-BH-A0E1-01	Primary Tumor	LEFT	44.88
TCGA-GM-A3NW-01	Primary Tumor	LEFT	44.82
TCGA-A2-A1G0-01	Primary Tumor	LEFT	44.81
TCGA-D8-A1XU-01	Primary Tumor	LEFT	44.78
TCGA-A2-A0YL-01	Primary Tumor	LEFT	44.73
TCGA-AR-A5QN-01	Primary Tumor	LEFT	44.7
TCGA-A2-A0D1-01	Primary Tumor	LEFT	44.49
TCGA-AC-A2FO-01	Primary Tumor	LEFT	44.49
TCGA-MS-A51U-01	Primary Tumor	LEFT	44.49
TCGA-BH-A8FZ-01	Primary Tumor	LEFT	44.44
TCGA-E2-A15I-01	Primary Tumor	LEFT	44.42
TCGA-LL-A442-01	Primary Tumor	LEFT	44.42
TCGA-AR-A2LO-01	Primary Tumor	LEFT	44.41
TCGA-D8-A1Y0-01	Primary Tumor	LEFT	44.32
TCGA-A8-A07E-01	Primary Tumor	LEFT	44.24
TCGA-AC-A3OD-01	Primary Tumor	LEFT	44.16
TCGA-B6-A0RP-01	Primary Tumor	LEFT	44.11
TCGA-BH-A0W3-01	Primary Tumor	LEFT	44.07
TCGA-BH-A1ET-01	Primary Tumor	LEFT	44.05
TCGA-A2-A0SU-01	Primary Tumor	LEFT	44.02
TCGA-A1-A0SH-01	Primary Tumor	LEFT	44.01
TCGA-A7-A26E-01	Primary Tumor	LEFT	43.92
TCGA-BH-A0BO-01	Primary Tumor	LEFT	43.9
TCGA-LL-A73Z-01	Primary Tumor	LEFT	43.9
TCGA-A2-A259-01	Primary Tumor	LEFT	43.87
TCGA-AN-A0XO-01	Primary Tumor	LEFT	43.82
TCGA-E2-A15F-01	Primary Tumor	LEFT	43.75
TCGA-D8-A140-01	Primary Tumor	LEFT	43.68
TCGA-A1-A0SF-01	Primary Tumor	LEFT	43.65
TCGA-E2-A1B5-01	Primary Tumor	LEFT	43.57
TCGA-E2-A1IF-01	Primary Tumor	LEFT	43.53
TCGA-XX-A89A-01	Primary Tumor	LEFT	43.51
TCGA-A1-A0SM-01	Primary Tumor	LEFT	43.49
TCGA-A8-A0A6-01	Primary Tumor	LEFT	43.49
TCGA-EW-A2FS-01	Primary Tumor	LEFT	43.46
TCGA-BH-A0BA-01	Primary Tumor	LEFT	43.4
TCGA-E9-A3HO-01	Primary Tumor	LEFT	43.22
TCGA-GM-A2D9-01	Primary Tumor	LEFT	43.2
TCGA-BH-A0W4-01	Primary Tumor	LEFT	43.16
TCGA-GM-A5PX-01	Primary Tumor	LEFT	43.1
TCGA-BH-A0BJ-01	Primary Tumor	LEFT	42.98
TCGA-AC-A8OR-01	Primary Tumor	LEFT	42.82
TCGA-AR-A5QM-01	Primary Tumor	LEFT	42.78
TCGA-A8-A07S-01	Primary Tumor	LEFT	42.76
TCGA-BH-A0H3-01	Primary Tumor	LEFT	42.76
TCGA-OL-A5RZ-01	Primary Tumor	LEFT	42.74
TCGA-AO-A0JF-01	Primary Tumor	LEFT	42.66
TCGA-A7-A26H-01	Primary Tumor	LEFT	42.58
TCGA-A8-A08G-01	Primary Tumor	LEFT	42.55
TCGA-A2-A0T6-01	Primary Tumor	LEFT	42.53
TCGA-GM-A3NY-01	Primary Tumor	LEFT	42.52
TCGA-AR-A1AX-01	Primary Tumor	LEFT	42.39
TCGA-AR-A1AV-01	Primary Tumor	LEFT	42.38
TCGA-BH-A0BS-01	Primary Tumor	LEFT	42.38
TCGA-D8-A1JU-01	Primary Tumor	LEFT	42.38
TCGA-E2-A15G-01	Primary Tumor	LEFT	42.38
TCGA-E2-A1B1-01	Primary Tumor	LEFT	42.35
TCGA-Z7-A8R5-01	Primary Tumor	LEFT	42.34
TCGA-AC-A2FB-01	Primary Tumor	LEFT	42.29
TCGA-A2-A0YD-01	Primary Tumor	LEFT	42.27
TCGA-AO-A12C-01	Primary Tumor	LEFT	42.22
TCGA-BH-AB28-01	Primary Tumor	LEFT	42.2
TCGA-E2-A10B-01	Primary Tumor	LEFT	42.19
TCGA-BH-A18N-01	Primary Tumor	LEFT	42.15
TCGA-AC-A6IX-01	Primary Tumor	LEFT	42.13
TCGA-BH-A18M-01	Primary Tumor	LEFT	42.13
TCGA-A2-A0T5-01	Primary Tumor	LEFT	42.1
TCGA-AN-A0XW-01	Primary Tumor	LEFT	42.09
TCGA-E9-A1R0-01	Primary Tumor	LEFT	42.08
TCGA-BH-A0B0-01	Primary Tumor	LEFT	41.99
TCGA-A2-A0EO-01	Primary Tumor	LEFT	41.97
TCGA-AN-A0XT-01	Primary Tumor	LEFT	41.94
TCGA-A8-A097-01	Primary Tumor	LEFT	41.93
TCGA-D8-A1XF-01	Primary Tumor	LEFT	41.93
TCGA-D8-A1JC-01	Primary Tumor	LEFT	41.87
TCGA-E9-A2JT-01	Primary Tumor	LEFT	41.87
TCGA-A2-A0CR-01	Primary Tumor	LEFT	41.82
TCGA-E9-A1NH-01	Primary Tumor	LEFT	41.82
TCGA-BH-A8FY-01	Primary Tumor	LEFT	41.71
TCGA-OL-A66N-01	Primary Tumor	LEFT	41.69
TCGA-A2-A0CV-01	Primary Tumor	LEFT	41.67
TCGA-EW-A1PE-01	Primary Tumor	LEFT	41.61
TCGA-LD-A7W5-01	Primary Tumor	LEFT	41.59
TCGA-A8-A095-01	Primary Tumor	LEFT	41.58
TCGA-A8-A09A-01	Primary Tumor	LEFT	41.58
TCGA-D8-A1XY-01	Primary Tumor	LEFT	41.53
TCGA-BH-A0DK-01	Primary Tumor	LEFT	41.5
TCGA-E9-A1QZ-01	Primary Tumor	LEFT	41.5
TCGA-E9-A54X-01	Primary Tumor	LEFT	41.49
TCGA-A8-A09R-01	Primary Tumor	LEFT	41.45
TCGA-A2-A0EX-01	Primary Tumor	LEFT	41.44
TCGA-AQ-A04H-01	Primary Tumor	LEFT	41.36
TCGA-E2-A10F-01	Primary Tumor	LEFT	41.35
TCGA-AR-A24M-01	Primary Tumor	LEFT	41.33
TCGA-D8-A1XO-01	Primary Tumor	LEFT	41.3
TCGA-AO-A0JB-01	Primary Tumor	LEFT	41.29
TCGA-OL-A5RU-01	Primary Tumor	LEFT	41.29
TCGA-E9-A1R2-01	Primary Tumor	LEFT	41.23
TCGA-E9-A22H-01	Primary Tumor	LEFT	41.23
TCGA-A7-A0D9-01	Primary Tumor	LEFT	41.16
TCGA-C8-A1HL-01	Primary Tumor	LEFT	41.16
TCGA-D8-A73X-01	Primary Tumor	LEFT	41.1
TCGA-A7-A13G-01	Primary Tumor	LEFT	41.06
TCGA-BH-A0HQ-01	Primary Tumor	LEFT	41.05
TCGA-A7-A4SA-01	Primary Tumor	LEFT	41.03
TCGA-A8-A08L-01	Primary Tumor	LEFT	41.02
TCGA-C8-A12M-01	Primary Tumor	LEFT	40.97
TCGA-E9-A247-01	Primary Tumor	LEFT	40.95
TCGA-BH-A1FE-01	Primary Tumor	LEFT	40.93
TCGA-A7-A0CH-01	Primary Tumor	LEFT	40.91
TCGA-E2-A2P5-01	Primary Tumor	LEFT	40.86
TCGA-B6-A0WS-01	Primary Tumor	LEFT	40.85
TCGA-BH-A0C3-01	Primary Tumor	LEFT	40.81
TCGA-BH-A18I-01	Primary Tumor	LEFT	40.77
TCGA-EW-A1PG-01	Primary Tumor	LEFT	40.71
TCGA-E2-A105-01	Primary Tumor	LEFT	40.69
TCGA-D8-A1XD-01	Primary Tumor	LEFT	40.56
TCGA-E2-A2P6-01	Primary Tumor	LEFT	40.55
TCGA-B6-A0IG-01	Primary Tumor	LEFT	40.52
TCGA-A8-A09Q-01	Primary Tumor	LEFT	40.51
TCGA-A8-A07P-01	Primary Tumor	LEFT	40.5
TCGA-A1-A0SJ-01	Primary Tumor	LEFT	40.43
TCGA-AN-A041-01	Primary Tumor	LEFT	40.32
TCGA-B6-A0RG-01	Primary Tumor	LEFT	40.24
TCGA-A2-A3XZ-01	Primary Tumor	LEFT	40.2
TCGA-A2-A25C-01	Primary Tumor	LEFT	40.18
TCGA-B6-A40C-01	Primary Tumor	LEFT	40.18
TCGA-BH-A204-01	Primary Tumor	LEFT	40.18
TCGA-E2-A14T-01	Primary Tumor	LEFT	40.18
TCGA-AR-A0TR-01	Primary Tumor	LEFT	40.15
TCGA-AR-A5QP-01	Primary Tumor	LEFT	40.15
TCGA-B6-A0IP-01	Primary Tumor	LEFT	40.15
TCGA-BH-A0DH-01	Primary Tumor	LEFT	40.15
TCGA-E2-A14Z-01	Primary Tumor	LEFT	40.15
TCGA-D8-A1JP-01	Primary Tumor	LEFT	40.14
TCGA-E2-A10E-01	Primary Tumor	LEFT	40.12
TCGA-EW-A3E8-01	Primary Tumor	LEFT	40.08
TCGA-BH-A0B6-01	Primary Tumor	LEFT	40.06
TCGA-A2-A04X-01	Primary Tumor	LEFT	40.05
TCGA-E2-A15S-01	Primary Tumor	LEFT	40.05
TCGA-A7-A26J-01	Primary Tumor	LEFT	40.04
TCGA-C8-A132-01	Primary Tumor	LEFT	40.04
TCGA-LL-A5YM-01	Primary Tumor	LEFT	39.9
TCGA-EW-A1J3-01	Primary Tumor	LEFT	39.86
TCGA-EW-A2FV-01	Primary Tumor	LEFT	39.83
TCGA-A2-A0EV-01	Primary Tumor	LEFT	39.82
TCGA-BH-A0B5-01	Primary Tumor	LEFT	39.82
TCGA-EW-A1J5-01	Primary Tumor	LEFT	39.79
TCGA-A8-A08H-01	Primary Tumor	LEFT	39.77
TCGA-AN-A0FY-01	Primary Tumor	LEFT	39.76
TCGA-D8-A27K-01	Primary Tumor	LEFT	39.76
TCGA-GM-A2DI-01	Primary Tumor	LEFT	39.76
TCGA-B6-A401-01	Primary Tumor	LEFT	39.75
TCGA-AO-A03R-01	Primary Tumor	LEFT	39.72
TCGA-A2-A04R-01	Primary Tumor	LEFT	39.7
TCGA-BH-A0E7-01	Primary Tumor	LEFT	39.68
TCGA-D8-A73U-01	Primary Tumor	LEFT	39.64
TCGA-BH-A0C7-01	Primary Tumor	LEFT	39.62
TCGA-E2-A1B4-01	Primary Tumor	LEFT	39.58
TCGA-E2-A572-01	Primary Tumor	LEFT	39.58
TCGA-A8-A084-01	Primary Tumor	LEFT	39.54
TCGA-C8-A138-01	Primary Tumor	LEFT	39.54
TCGA-BH-A0HN-01	Primary Tumor	LEFT	39.47
TCGA-PE-A5DE-01	Primary Tumor	LEFT	39.47
TCGA-A7-A6VX-01	Primary Tumor	LEFT	39.36
TCGA-AN-A0XS-01	Primary Tumor	LEFT	39.32
TCGA-EW-A6SC-01	Primary Tumor	LEFT	39.31
TCGA-E9-A1RI-01	Primary Tumor	LEFT	39.22
TCGA-EW-A423-01	Primary Tumor	LEFT	39.22
TCGA-E9-A1N4-01	Primary Tumor	LEFT	39.21
TCGA-D8-A1XA-01	Primary Tumor	LEFT	39.2
TCGA-E2-A156-01	Primary Tumor	LEFT	39.18
TCGA-C8-A12O-01	Primary Tumor	LEFT	39.16
TCGA-AC-A5XU-01	Primary Tumor	LEFT	39.14
TCGA-AR-A0TX-01	Primary Tumor	LEFT	39.13
TCGA-GM-A2DN-01	Primary Tumor	LEFT	39.1
TCGA-B6-A0RM-01	Primary Tumor	LEFT	39.06
TCGA-BH-A0HX-01	Primary Tumor	LEFT	39.02
TCGA-EW-A1P0-01	Primary Tumor	LEFT	38.96
TCGA-OL-A97C-01	Primary Tumor	LEFT	38.93
TCGA-AR-A24P-01	Primary Tumor	LEFT	38.91
TCGA-AR-A24Z-01	Primary Tumor	LEFT	38.82
TCGA-AR-A2LJ-01	Primary Tumor	LEFT	38.82
TCGA-BH-A208-01	Primary Tumor	LEFT	38.82
TCGA-BH-A18K-01	Primary Tumor	LEFT	38.81
TCGA-A2-A3XY-01	Primary Tumor	LEFT	38.79
TCGA-B6-A40B-01	Primary Tumor	LEFT	38.78
TCGA-E9-A1N5-01	Primary Tumor	LEFT	38.78
TCGA-AR-A1AW-01	Primary Tumor	LEFT	38.77
TCGA-E2-A153-01	Primary Tumor	LEFT	38.75
TCGA-4H-AAAK-01	Primary Tumor	LEFT	38.72
TCGA-A2-A0SY-01	Primary Tumor	LEFT	38.69
TCGA-E9-A3X8-01	Primary Tumor	LEFT	38.67
TCGA-A7-A0CD-01	Primary Tumor	LEFT	38.66
TCGA-BH-A0W7-01	Primary Tumor	LEFT	38.64
TCGA-E2-A1L8-01	Primary Tumor	LEFT	38.63
TCGA-A1-A0SN-01	Primary Tumor	LEFT	38.62
TCGA-A7-A0CE-01	Primary Tumor	LEFT	38.62
TCGA-AC-A23C-01	Primary Tumor	LEFT	38.6
TCGA-AN-A03X-01	Primary Tumor	LEFT	38.58
TCGA-AO-A0JI-01	Primary Tumor	LEFT	38.57
TCGA-C8-A26W-01	Primary Tumor	LEFT	38.57
TCGA-BH-A1EW-01	Primary Tumor	LEFT	38.56
TCGA-AR-A0U2-01	Primary Tumor	LEFT	38.51
TCGA-AN-A0FF-01	Primary Tumor	LEFT	38.46
TCGA-BH-A5J0-01	Primary Tumor	LEFT	38.44
TCGA-D8-A1X9-01	Primary Tumor	LEFT	38.4
TCGA-D8-A1JD-01	Primary Tumor	LEFT	38.37
TCGA-BH-A0BQ-01	Primary Tumor	LEFT	38.36
TCGA-B6-A0IO-01	Primary Tumor	LEFT	38.34
TCGA-C8-A12X-01	Primary Tumor	LEFT	38.25
TCGA-D8-A1JN-01	Primary Tumor	LEFT	38.24
TCGA-AR-A1AO-01	Primary Tumor	LEFT	38.23
TCGA-BH-A1FL-01	Primary Tumor	LEFT	38.23
TCGA-LL-A9Q3-01	Primary Tumor	LEFT	38.21
TCGA-EW-A1IZ-01	Primary Tumor	LEFT	38.18
TCGA-AR-A250-01	Primary Tumor	LEFT	38.17
TCGA-AO-A1KS-01	Primary Tumor	LEFT	38.08
TCGA-E2-A10A-01	Primary Tumor	LEFT	38.08
TCGA-BH-A0BD-01	Primary Tumor	LEFT	38.03
TCGA-A8-A07F-01	Primary Tumor	LEFT	37.99
TCGA-E2-A576-01	Primary Tumor	LEFT	37.96
TCGA-BH-A0BP-01	Primary Tumor	LEFT	37.87
TCGA-E2-A15T-01	Primary Tumor	LEFT	37.87
TCGA-AR-A0U3-01	Primary Tumor	LEFT	37.81
TCGA-OL-A5D6-01	Primary Tumor	LEFT	37.8
TCGA-B6-A408-01	Primary Tumor	LEFT	37.77
TCGA-BH-A0DX-01	Primary Tumor	LEFT	37.7
TCGA-B6-A0WX-01	Primary Tumor	LEFT	37.69
TCGA-A2-A25E-01	Primary Tumor	LEFT	37.66
TCGA-A1-A0SB-01	Primary Tumor	LEFT	37.65
TCGA-EW-A1OY-01	Primary Tumor	LEFT	37.65
TCGA-A8-A07B-01	Primary Tumor	LEFT	37.63
TCGA-E9-A2JS-01	Primary Tumor	LEFT	37.63
TCGA-E9-A226-01	Primary Tumor	LEFT	37.61
TCGA-A8-A0AB-01	Primary Tumor	LEFT	37.59
TCGA-C8-A8HQ-01	Primary Tumor	LEFT	37.54
TCGA-AN-A0FW-01	Primary Tumor	LEFT	37.49
TCGA-C8-A12Q-01	Primary Tumor	LEFT	37.47
TCGA-EW-A6SA-01	Primary Tumor	LEFT	37.47
TCGA-AN-A0FX-01	Primary Tumor	LEFT	37.42
TCGA-A8-A06O-01	Primary Tumor	LEFT	37.38
TCGA-AC-A5XS-01	Primary Tumor	LEFT	37.36
TCGA-BH-A0AY-01	Primary Tumor	LEFT	37.33
TCGA-BH-A0HW-01	Primary Tumor	LEFT	37.25
TCGA-A8-A07I-01	Primary Tumor	LEFT	37.15
TCGA-A8-A09K-01	Primary Tumor	LEFT	37.15
TCGA-C8-A130-01	Primary Tumor	LEFT	37.14
TCGA-D8-A27G-01	Primary Tumor	LEFT	37.14
TCGA-E2-A14V-01	Primary Tumor	LEFT	37.09
TCGA-BH-A6R9-01	Primary Tumor	LEFT	37.08
TCGA-D8-A1JE-01	Primary Tumor	LEFT	37.08
TCGA-E2-A14S-01	Primary Tumor	LEFT	37.08
TCGA-5T-A9QA-01	Primary Tumor	LEFT	37.04
TCGA-LD-A9QF-01	Primary Tumor	LEFT	37.04
TCGA-E9-A1RA-01	Primary Tumor	LEFT	37.03
TCGA-AN-A0FZ-01	Primary Tumor	LEFT	37
TCGA-B6-A0IE-01	Primary Tumor	LEFT	36.98
TCGA-B6-A0X5-01	Primary Tumor	LEFT	36.96
TCGA-BH-A0HY-01	Primary Tumor	LEFT	36.93
TCGA-D8-A1XS-01	Primary Tumor	LEFT	36.92
TCGA-B6-A0I6-01	Primary Tumor	LEFT	36.9
TCGA-BH-A0AU-01	Primary Tumor	LEFT	36.86
TCGA-AR-A2LL-01	Primary Tumor	LEFT	36.84
TCGA-BH-A1F0-01	Primary Tumor	LEFT	36.84
TCGA-A7-A4SE-01	Primary Tumor	LEFT	36.77
TCGA-E2-A154-01	Primary Tumor	LEFT	36.76
TCGA-BH-A0B4-01	Primary Tumor	LEFT	36.73
TCGA-AO-A03N-01	Primary Tumor	LEFT	36.72
TCGA-AN-A0XR-01	Primary Tumor	LEFT	36.71
TCGA-WT-AB44-01	Primary Tumor	LEFT	36.7
TCGA-A8-A085-01	Primary Tumor	LEFT	36.64
TCGA-AC-A5EH-01	Primary Tumor	LEFT	36.64
TCGA-BH-A18P-01	Primary Tumor	LEFT	36.64
TCGA-S3-A6ZH-01	Primary Tumor	LEFT	36.5
TCGA-BH-A0BR-01	Primary Tumor	LEFT	36.42
TCGA-A2-A0YG-01	Primary Tumor	LEFT	36.38
TCGA-E2-A1B0-01	Primary Tumor	LEFT	36.36
TCGA-AC-A2BM-01	Primary Tumor	LEFT	36.34
TCGA-BH-A0AW-01	Primary Tumor	LEFT	36.3
TCGA-AN-A049-01	Primary Tumor	LEFT	36.29
TCGA-E9-A1RE-01	Primary Tumor	LEFT	36.29
TCGA-AN-A03Y-01	Primary Tumor	LEFT	36.28
TCGA-C8-A12T-01	Primary Tumor	LEFT	36.28
TCGA-B6-A3ZX-01	Primary Tumor	LEFT	36.24
TCGA-A8-A092-01	Primary Tumor	LEFT	36.15
TCGA-A8-A06T-01	Primary Tumor	LEFT	36.14
TCGA-AO-A0J7-01	Primary Tumor	LEFT	36.07
TCGA-BH-A209-01	Primary Tumor	LEFT	36.04
TCGA-E9-A1RF-01	Primary Tumor	LEFT	36.04
TCGA-BH-A1F8-01	Primary Tumor	LEFT	36
TCGA-BH-A18L-01	Primary Tumor	LEFT	35.98
TCGA-GM-A2DB-01	Primary Tumor	LEFT	35.97
TCGA-A8-A09T-01	Primary Tumor	LEFT	35.93
TCGA-C8-A26Y-01	Primary Tumor	LEFT	35.9
TCGA-OL-A5D8-01	Primary Tumor	LEFT	35.88
TCGA-E2-A155-01	Primary Tumor	LEFT	35.86
TCGA-A2-A0D4-01	Primary Tumor	LEFT	35.85
TCGA-5L-AAT1-01	Primary Tumor	LEFT	35.83
TCGA-AO-A12D-01	Primary Tumor	LEFT	35.81
TCGA-C8-A12Y-01	Primary Tumor	LEFT	35.77
TCGA-E2-A15O-01	Primary Tumor	LEFT	35.77
TCGA-E9-A1NI-01	Primary Tumor	LEFT	35.74
TCGA-A8-A06Y-01	Primary Tumor	LEFT	35.69
TCGA-B6-A0RH-01	Primary Tumor	LEFT	35.62
TCGA-A8-A08A-01	Primary Tumor	LEFT	35.61
TCGA-C8-A12P-01	Primary Tumor	LEFT	35.59
TCGA-AO-A03M-01	Primary Tumor	LEFT	35.58
TCGA-D8-A1J9-01	Primary Tumor	LEFT	35.54
TCGA-E9-A1R4-01	Primary Tumor	LEFT	35.53
TCGA-AR-A0TZ-01	Primary Tumor	LEFT	35.51
TCGA-BH-A18Q-01	Primary Tumor	LEFT	35.49
TCGA-GM-A2DL-01	Primary Tumor	LEFT	35.49
TCGA-A2-A04P-01	Primary Tumor	LEFT	35.43
TCGA-E2-A15A-01	Primary Tumor	LEFT	35.38
TCGA-B6-A0IQ-01	Primary Tumor	LEFT	35.33
TCGA-BH-A1EV-01	Primary Tumor	LEFT	35.32
TCGA-BH-A1FD-01	Primary Tumor	LEFT	35.3
TCGA-EW-A1PC-01	Primary Tumor	LEFT	35.22
TCGA-B6-A0I9-01	Primary Tumor	LEFT	35.2
TCGA-B6-A400-01	Primary Tumor	LEFT	35.19
TCGA-C8-A12W-01	Primary Tumor	LEFT	35.18
TCGA-AN-A0FD-01	Primary Tumor	LEFT	35.13
TCGA-BH-A1F2-01	Primary Tumor	LEFT	35.12
TCGA-A8-A09E-01	Primary Tumor	LEFT	35.08
TCGA-BH-A0E6-01	Primary Tumor	LEFT	35.06
TCGA-JL-A3YX-01	Primary Tumor	LEFT	35.03
TCGA-AO-A1KT-01	Primary Tumor	LEFT	35
TCGA-BH-A0RX-01	Primary Tumor	LEFT	34.95
TCGA-A2-A0YH-01	Primary Tumor	LEFT	34.93
TCGA-D8-A1JF-01	Primary Tumor	LEFT	34.88
TCGA-AO-A125-01	Primary Tumor	LEFT	34.83
TCGA-A2-A4S3-01	Primary Tumor	LEFT	34.82
TCGA-BH-A0GY-01	Primary Tumor	LEFT	34.82
TCGA-HN-A2NL-01	Primary Tumor	LEFT	34.81
TCGA-A2-A0EQ-01	Primary Tumor	LEFT	34.79
TCGA-A8-A0A9-01	Primary Tumor	LEFT	34.76
TCGA-AR-A1AT-01	Primary Tumor	LEFT	34.6
TCGA-E2-A14O-01	Primary Tumor	LEFT	34.6
TCGA-E2-A1AZ-01	Primary Tumor	LEFT	34.6
TCGA-AR-A24N-01	Primary Tumor	LEFT	34.56
TCGA-E2-A10C-01	Primary Tumor	LEFT	34.54
TCGA-AR-A1AP-01	Primary Tumor	LEFT	34.53
TCGA-A8-A083-01	Primary Tumor	LEFT	34.48
TCGA-S3-AA12-01	Primary Tumor	LEFT	34.41
TCGA-E9-A1RB-01	Primary Tumor	LEFT	34.4
TCGA-A8-A07Z-01	Primary Tumor	LEFT	34.39
TCGA-BH-A202-01	Primary Tumor	LEFT	34.38
TCGA-Z7-A8R6-01	Primary Tumor	LEFT	34.37
TCGA-A8-A076-01	Primary Tumor	LEFT	34.35
TCGA-AR-A24U-01	Primary Tumor	LEFT	34.31
TCGA-E2-A1B6-01	Primary Tumor	LEFT	34.26
TCGA-BH-A1FG-01	Primary Tumor	LEFT	34.25
TCGA-C8-A1HN-01	Primary Tumor	LEFT	34.14
TCGA-BH-A0BZ-01	Primary Tumor	LEFT	34.06
TCGA-AR-A254-01	Primary Tumor	LEFT	33.99
TCGA-EW-A3U0-01	Primary Tumor	LEFT	33.98
TCGA-A8-A08Z-01	Primary Tumor	LEFT	33.97
TCGA-BH-A18U-01	Primary Tumor	LEFT	33.94
TCGA-A2-A3XS-01	Primary Tumor	LEFT	33.82
TCGA-A2-A0SX-01	Primary Tumor	LEFT	33.79
TCGA-AO-A0JD-01	Primary Tumor	LEFT	33.77
TCGA-AC-A7VC-01	Primary Tumor	LEFT	33.75
TCGA-LL-A7T0-01	Primary Tumor	LEFT	33.71
TCGA-E2-A1LG-01	Primary Tumor	LEFT	33.68
TCGA-A8-A08S-01	Primary Tumor	LEFT	33.62
TCGA-AO-A0JL-01	Primary Tumor	LEFT	33.6
TCGA-C8-A8HP-01	Primary Tumor	LEFT	33.49
TCGA-PL-A8LZ-01	Primary Tumor	LEFT	33.47
TCGA-A7-A0CJ-01	Primary Tumor	LEFT	33.38
TCGA-AO-A1KP-01	Primary Tumor	LEFT	33.37
TCGA-AR-A0TV-01	Primary Tumor	LEFT	33.23
TCGA-S3-A6ZG-01	Primary Tumor	LEFT	33.22
TCGA-AR-A24Q-01	Primary Tumor	LEFT	33.13
TCGA-A8-A07W-01	Primary Tumor	LEFT	33.08
TCGA-D8-A1Y1-01	Primary Tumor	LEFT	33.03
TCGA-AN-A0AS-01	Primary Tumor	LEFT	32.99
TCGA-A8-A06N-01	Primary Tumor	LEFT	32.9
TCGA-EW-A1OZ-01	Primary Tumor	LEFT	32.9
TCGA-BH-A1EY-01	Primary Tumor	LEFT	32.83
TCGA-D8-A1XJ-01	Primary Tumor	LEFT	32.79
TCGA-LL-A5YO-01	Primary Tumor	LEFT	32.78
TCGA-BH-A6R8-01	Primary Tumor	LEFT	32.68
TCGA-A2-A0YT-01	Primary Tumor	LEFT	32.66
TCGA-A8-A075-01	Primary Tumor	LEFT	32.64
TCGA-AR-A1AY-01	Primary Tumor	LEFT	32.64
TCGA-E2-A159-01	Primary Tumor	LEFT	32.6
TCGA-D8-A142-01	Primary Tumor	LEFT	32.58
TCGA-E2-A15J-01	Primary Tumor	LEFT	32.53
TCGA-AO-A1KQ-01	Primary Tumor	LEFT	32.5
TCGA-C8-A275-01	Primary Tumor	LEFT	32.46
TCGA-AN-A04C-01	Primary Tumor	LEFT	32.44
TCGA-AR-A0U1-01	Primary Tumor	LEFT	32.42
TCGA-A8-A079-01	Primary Tumor	LEFT	32.31
TCGA-BH-A42T-01	Primary Tumor	LEFT	32.31
TCGA-E9-A1N6-01	Primary Tumor	LEFT	32.26
TCGA-D8-A1XW-01	Primary Tumor	LEFT	32.2
TCGA-C8-A134-01	Primary Tumor	LEFT	32.14
TCGA-E9-A249-01	Primary Tumor	LEFT	32.11
TCGA-B6-A0IK-01	Primary Tumor	LEFT	32.07
TCGA-AR-A24K-01	Primary Tumor	LEFT	32.04
TCGA-A7-A56D-01	Primary Tumor	LEFT	32
TCGA-AN-A0AJ-01	Primary Tumor	LEFT	32
TCGA-A7-A26I-01	Primary Tumor	LEFT	31.86
TCGA-A2-A25B-01	Primary Tumor	LEFT	31.76
TCGA-AN-A0XU-01	Primary Tumor	LEFT	31.71
TCGA-C8-A135-01	Primary Tumor	LEFT	31.7
TCGA-A8-A08X-01	Primary Tumor	LEFT	31.6
TCGA-LL-A7SZ-01	Primary Tumor	LEFT	31.46
TCGA-A8-A08C-01	Primary Tumor	LEFT	31.42
TCGA-AR-A1AS-01	Primary Tumor	LEFT	31.42
TCGA-A2-A04T-01	Primary Tumor	LEFT	31.39
TCGA-JL-A3YW-01	Primary Tumor	LEFT	31.36
TCGA-AR-A251-01	Primary Tumor	LEFT	31.34
TCGA-A2-A0CS-01	Primary Tumor	LEFT	31.25
TCGA-A2-A0CY-01	Primary Tumor	LEFT	31.21
TCGA-AR-A0TP-01	Primary Tumor	LEFT	31.1
TCGA-A8-A07R-01	Primary Tumor	LEFT	31.01
TCGA-AN-A04D-01	Primary Tumor	LEFT	30.89
TCGA-D8-A1JL-01	Primary Tumor	LEFT	30.88
TCGA-AN-A0AM-01	Primary Tumor	LEFT	30.87
TCGA-EW-A6SD-01	Primary Tumor	LEFT	30.8
TCGA-B6-A0I1-01	Primary Tumor	LEFT	30.75
TCGA-B6-A0RS-01	Primary Tumor	LEFT	30.74
TCGA-A2-A0D3-01	Primary Tumor	LEFT	30.69
TCGA-E9-A1NA-01	Primary Tumor	LEFT	30.66
TCGA-A8-A09X-01	Primary Tumor	LEFT	30.6
TCGA-AN-A0AK-01	Primary Tumor	LEFT	30.56
TCGA-A7-A0DA-01	Primary Tumor	LEFT	30.53
TCGA-D8-A1JA-01	Primary Tumor	LEFT	30.5
TCGA-AN-A0AL-01	Primary Tumor	LEFT	30.49
TCGA-EW-A1OW-01	Primary Tumor	LEFT	30.49
TCGA-GM-A2DF-01	Primary Tumor	LEFT	30.4
TCGA-WT-AB41-01	Primary Tumor	LEFT	30.36
TCGA-AO-A0J4-01	Primary Tumor	LEFT	30.33
TCGA-A8-A06Q-01	Primary Tumor	LEFT	30.3
TCGA-C8-A1HF-01	Primary Tumor	LEFT	30.29
TCGA-D8-A1X6-01	Primary Tumor	LEFT	30.28
TCGA-D8-A27M-01	Primary Tumor	LEFT	30.27
TCGA-E2-A1LK-01	Primary Tumor	LEFT	30.27
TCGA-AO-A03U-01	Primary Tumor	LEFT	30.18
TCGA-A7-A5ZV-01	Primary Tumor	LEFT	30.11
TCGA-E9-A5UP-01	Primary Tumor	LEFT	30.04
TCGA-A2-A0CX-01	Primary Tumor	LEFT	30.03
TCGA-D8-A143-01	Primary Tumor	LEFT	29.98
TCGA-A7-A26F-01	Primary Tumor	LEFT	29.96
TCGA-BH-A1F6-01	Primary Tumor	LEFT	29.84
TCGA-AO-A129-01	Primary Tumor	LEFT	29.82
TCGA-A8-A094-01	Primary Tumor	LEFT	29.6
TCGA-E2-A14W-01	Primary Tumor	LEFT	29.48
TCGA-AO-A124-01	Primary Tumor	LEFT	29.33
TCGA-C8-A278-01	Primary Tumor	LEFT	29.15
TCGA-BH-A0C0-01	Primary Tumor	LEFT	29.12
TCGA-A2-A3XX-01	Primary Tumor	LEFT	29.08
TCGA-E9-A244-01	Primary Tumor	LEFT	29.05
TCGA-D8-A1JT-01	Primary Tumor	LEFT	28.96
TCGA-C8-A1HM-01	Primary Tumor	LEFT	28.94
TCGA-AN-A0FJ-01	Primary Tumor	LEFT	28.91
TCGA-D8-A1XL-01	Primary Tumor	LEFT	28.91
TCGA-BH-A0AV-01	Primary Tumor	LEFT	28.83
TCGA-B6-A0RL-01	Primary Tumor	LEFT	28.74
TCGA-C8-A131-01	Primary Tumor	LEFT	28.67
TCGA-BH-A0BG-01	Primary Tumor	LEFT	28.59
TCGA-E2-A1LI-01	Primary Tumor	LEFT	28.36
TCGA-AN-A0FL-01	Primary Tumor	LEFT	28.3
TCGA-AR-A0U0-01	Primary Tumor	LEFT	28.16
TCGA-A2-A0D2-01	Primary Tumor	LEFT	28
TCGA-D8-A1JK-01	Primary Tumor	LEFT	27.92
TCGA-AC-A2QJ-01	Primary Tumor	LEFT	27.74
TCGA-A2-A0YM-01	Primary Tumor	LEFT	27.62
TCGA-AR-A1AI-01	Primary Tumor	LEFT	27.59
TCGA-A8-A08R-01	Primary Tumor	LEFT	27.44
TCGA-A2-A3XT-01	Primary Tumor	LEFT	27.3
TCGA-E9-A3QA-01	Primary Tumor	LEFT	27.18
TCGA-BH-A0E0-01	Primary Tumor	LEFT	27.06
TCGA-E2-A150-01	Primary Tumor	LEFT	26.97
TCGA-AO-A0J6-01	Primary Tumor	LEFT	26.89
TCGA-AO-A0J2-01	Primary Tumor	LEFT	26.8
TCGA-EW-A1P4-01	Primary Tumor	LEFT	26.42
TCGA-E9-A1ND-01	Primary Tumor	LEFT	26.34
TCGA-C8-A137-01	Primary Tumor	LEFT	26.27
TCGA-A2-A3Y0-01	Primary Tumor	LEFT	26.23
TCGA-AR-A1AR-01	Primary Tumor	LEFT	26.16
TCGA-A2-A3XU-01	Primary Tumor	LEFT	25.91
TCGA-EW-A1P8-01	Primary Tumor	LEFT	25.89
TCGA-AC-A2BK-01	Primary Tumor	LEFT	25.86
TCGA-A2-A0T0-01	Primary Tumor	LEFT	25.83
TCGA-OL-A5D7-01	Primary Tumor	LEFT	25.83
TCGA-AC-A6IW-01	Primary Tumor	LEFT	25.82
TCGA-S3-AA0Z-01	Primary Tumor	LEFT	25.55
TCGA-E2-A158-01	Primary Tumor	LEFT	25.5
TCGA-A7-A6VW-01	Primary Tumor	LEFT	25.36
TCGA-BH-A0BW-01	Primary Tumor	LEFT	25.35
TCGA-A7-A13E-01	Primary Tumor	LEFT	25.22
TCGA-B6-A0X1-01	Primary Tumor	LEFT	25.2
TCGA-E9-A22G-01	Primary Tumor	LEFT	25.06
TCGA-E2-A1LL-01	Primary Tumor	LEFT	25.04
TCGA-A2-A0CM-01	Primary Tumor	LEFT	25.02
TCGA-BH-A0DL-01	Primary Tumor	LEFT	25.02
TCGA-E2-A574-01	Primary Tumor	LEFT	24.95
TCGA-AC-A62X-01	Primary Tumor	LEFT	24.8
TCGA-A2-A0D0-01	Primary Tumor	LEFT	24.59
TCGA-D8-A1XK-01	Primary Tumor	LEFT	24.06
TCGA-E2-A14R-01	Primary Tumor	LEFT	23.95
TCGA-EW-A6SB-01	Primary Tumor	LEFT	23.92
TCGA-BH-A5IZ-01	Primary Tumor	LEFT	23.18
TCGA-AR-A0U4-01	Primary Tumor	LEFT	22.68
TCGA-E2-A1II-01	Primary Tumor	LEFT	21.42
TCGA-B6-A0I2-01	Primary Tumor	LEFT	20.75
TCGA-A2-A0YJ-01	Primary Tumor	LEFT	20.38
TCGA-C8-A27B-01	Primary Tumor	LEFT	20.33
TCGA-AQ-A54N-01	Primary Tumor	LEFT	20.13
