# Supplementary material for: The Yin and Yang of Breast Cancer: Ion Channels as Determinants of Left-Right Functional Differences
Source: Preprints.org preprint supplement (doi:10.20944/preprints202305.1160.v1), 2023-05-16
Supplement: Supplementary file 7 [file SupFile4.xlsx]

## Sheet: Hoja1
sample	6-ICH signature expression	6-DNA meth signature expression	Side
TCGA-A1-A0SK-01	55.42	50.4	RIGHT
TCGA-E9-A245-01	53.89	43.23	LEFT
TCGA-A2-A4S0-01	52.58	40.41	RIGHT
TCGA-BH-A0E9-01	51.96	43.45	RIGHT
TCGA-AO-A12B-01	51.2	39.9	RIGHT
TCGA-E9-A3Q9-01	51.1	39.64	RIGHT
TCGA-B6-A0X4-01	50.84	39.21	LEFT
TCGA-BH-A1FR-01	50.56	40.54	RIGHT
TCGA-EW-A1OX-01	50.24	37.61	RIGHT
TCGA-A1-A0SQ-01	50.13	38.93	LEFT
TCGA-D8-A1XG-01	49.9	39.26	RIGHT
TCGA-A2-A4RY-01	49.86	43.2	RIGHT
TCGA-E9-A1N3-01	49.69	40.01	RIGHT
TCGA-A7-A3J0-01	49.6	41.58	RIGHT
TCGA-A2-A3KD-01	49.59	42.4	RIGHT
TCGA-A2-A0CO-01	49.4	41.71	RIGHT
TCGA-A2-A0EW-01	49.25	41.45	RIGHT
TCGA-BH-A0DO-01	49.1	40.35	LEFT
TCGA-C8-A3M7-01	49.06	43.23	LEFT
TCGA-PL-A8LX-01	49.06	40.21	LEFT
TCGA-HN-A2OB-01	48.89	41.78	RIGHT
TCGA-GM-A3XG-01	48.88	42.33	RIGHT
TCGA-3C-AAAU-01	48.52	44.43	LEFT
TCGA-A1-A0SD-01	48.51	41.58	LEFT
TCGA-BH-A28O-01	48.37	42.25	RIGHT
TCGA-A2-A0ES-01	48.25	40.59	LEFT
TCGA-A7-A3RF-01	48.23	38.28	LEFT
TCGA-E2-A1IK-01	47.94	37.8	LEFT
TCGA-A2-A25A-01	47.92	42.32	LEFT
TCGA-D8-A27E-01	47.81	38	LEFT
TCGA-AO-A0JG-01	47.77	41.74	RIGHT
TCGA-B6-A0IH-01	47.67	42.04	LEFT
TCGA-E9-A227-01	47.65	40.74	LEFT
TCGA-A2-A1FV-01	47.58	41.21	LEFT
TCGA-LL-A440-01	47.51	43.17	LEFT
TCGA-BH-A1FH-01	47.51	41.88	LEFT
TCGA-A8-A0A4-01	47.5	42.9	LEFT
TCGA-E2-A14Q-01	47.5	40.63	LEFT
TCGA-D8-A145-01	47.39	42.1	RIGHT
TCGA-B6-A0WY-01	47.33	41.81	LEFT
TCGA-E9-A5UO-01	47.32	40	RIGHT
TCGA-AR-A2LQ-01	47.24	40.84	RIGHT
TCGA-BH-A0DE-01	47.22	39.78	LEFT
TCGA-AO-A03T-01	47.12	41.48	LEFT
TCGA-E2-A14U-01	47.1	42.79	RIGHT
TCGA-A7-A5ZX-01	47.1	41.97	LEFT
TCGA-AC-A2FK-01	47.09	42.54	LEFT
TCGA-BH-A1EU-01	47.09	40.73	RIGHT
TCGA-A8-A0AD-01	47.06	39.95	RIGHT
TCGA-D8-A27I-01	47.03	42.49	RIGHT
TCGA-AR-A2LN-01	47.01	41.13	RIGHT
TCGA-AQ-A7U7-01	47	43.82	LEFT
TCGA-C8-A1HO-01	47	42.23	LEFT
TCGA-OL-A5RV-01	46.97	43.21	RIGHT
TCGA-D8-A1X8-01	46.94	40.87	LEFT
TCGA-B6-A1KI-01	46.92	38.93	RIGHT
TCGA-D8-A1XC-01	46.86	37.47	RIGHT
TCGA-B6-A0RQ-01	46.82	41.86	RIGHT
TCGA-LD-A7W6-01	46.73	43.28	RIGHT
TCGA-A7-A426-01	46.72	43.13	RIGHT
TCGA-A7-A4SC-01	46.69	42.41	RIGHT
TCGA-AR-A1AM-01	46.63	43.36	RIGHT
TCGA-AC-A8OS-01	46.62	43.52	RIGHT
TCGA-BH-A0HP-01	46.54	41.79	LEFT
TCGA-GI-A2C8-01	46.5	37.93	RIGHT
TCGA-AR-A252-01	46.49	40.85	LEFT
TCGA-A2-A1G4-01	46.4	42.43	RIGHT
TCGA-AN-A0XL-01	46.31	41.95	LEFT
TCGA-A2-A0YK-01	46.29	42.13	LEFT
TCGA-A7-A0CG-01	46.28	40.87	RIGHT
TCGA-E9-A1RD-01	46.25	41.16	RIGHT
TCGA-BH-A0EA-01	46.25	40.55	LEFT
TCGA-LD-A74U-01	46.16	43.42	RIGHT
TCGA-E2-A1IL-01	46.14	42.13	LEFT
TCGA-A2-A1G6-01	46.12	40.22	RIGHT
TCGA-AR-A24W-01	46.12	39.9	RIGHT
TCGA-AC-A3HN-01	46.09	42.06	LEFT
TCGA-AO-A1KO-01	46.08	40.1	LEFT
TCGA-AN-A0FS-01	46.03	41.86	RIGHT
TCGA-AR-A1AK-01	45.9	43.04	RIGHT
TCGA-C8-A3M8-01	45.89	45.12	RIGHT
TCGA-AC-A3W7-01	45.89	42.58	RIGHT
TCGA-W8-A86G-01	45.84	43.54	LEFT
TCGA-B6-A0RV-01	45.83	42.85	RIGHT
TCGA-A8-A09B-01	45.81	42.43	LEFT
TCGA-AC-A2QI-01	45.81	41.13	RIGHT
TCGA-BH-A201-01	45.75	42.1	LEFT
TCGA-B6-A0WT-01	45.73	43.94	LEFT
TCGA-AR-A24O-01	45.73	41.44	LEFT
TCGA-AC-A3W6-01	45.69	43.17	RIGHT
TCGA-BH-A18S-01	45.69	40.21	RIGHT
TCGA-BH-A0GZ-01	45.64	42.33	LEFT
TCGA-A7-A3J1-01	45.6	42.12	LEFT
TCGA-A2-A3KC-01	45.57	44.18	RIGHT
TCGA-C8-A27A-01	45.55	44.97	RIGHT
TCGA-D8-A4Z1-01	45.52	43.6	RIGHT
TCGA-D8-A1XV-01	45.48	38.95	RIGHT
TCGA-AO-A0JJ-01	45.47	39.41	LEFT
TCGA-A1-A0SE-01	45.45	42.59	LEFT
TCGA-GM-A3XN-01	45.44	41.93	LEFT
TCGA-E2-A1L6-01	45.41	41.7	LEFT
TCGA-D8-A3Z6-01	45.39	41.43	LEFT
TCGA-A2-A0YI-01	45.34	40.26	RIGHT
TCGA-E2-A15E-01	45.33	42.58	LEFT
TCGA-BH-A42V-01	45.32	42.67	LEFT
TCGA-AC-A2FF-01	45.31	42.95	RIGHT
TCGA-BH-A8G0-01	45.28	42.64	LEFT
TCGA-OL-A66J-01	45.25	39.94	RIGHT
TCGA-AR-A1AL-01	45.19	41.96	LEFT
TCGA-AO-A03V-01	45.17	43.22	LEFT
TCGA-E2-A1IU-01	45.17	38.33	RIGHT
TCGA-E2-A15P-01	45.15	40.87	RIGHT
TCGA-D8-A1JI-01	45.15	38.74	RIGHT
TCGA-GM-A4E0-01	45.13	41.42	LEFT
TCGA-AR-A24T-01	45.11	40.73	RIGHT
TCGA-AN-A04A-01	45.11	40.36	LEFT
TCGA-A2-A0T7-01	45.09	43.03	RIGHT
TCGA-BH-A0HO-01	45.08	38.99	RIGHT
TCGA-BH-A0W5-01	45.06	42.75	LEFT
TCGA-D8-A146-01	45.05	41.56	RIGHT
TCGA-BH-A0DV-01	45.02	39.53	LEFT
TCGA-D8-A3Z5-01	44.98	41.47	RIGHT
TCGA-BH-A0HI-01	44.97	40.18	RIGHT
TCGA-EW-A1PA-01	44.92	43.85	LEFT
TCGA-AC-A2FG-01	44.92	41.19	LEFT
TCGA-BH-A0E1-01	44.88	39.95	LEFT
TCGA-B6-A0IN-01	44.87	41.32	RIGHT
TCGA-GM-A3NW-01	44.82	40.78	LEFT
TCGA-A2-A1G0-01	44.81	41.76	LEFT
TCGA-E2-A1IG-01	44.79	42.3	RIGHT
TCGA-OL-A66K-01	44.79	41.63	RIGHT
TCGA-D8-A1XU-01	44.78	41.55	LEFT
TCGA-A2-A0ER-01	44.78	41.24	RIGHT
TCGA-BH-A0DI-01	44.74	41.79	RIGHT
TCGA-A2-A0YL-01	44.73	42.63	LEFT
TCGA-AR-A5QN-01	44.7	41.96	LEFT
TCGA-BH-A1FB-01	44.7	41.62	RIGHT
TCGA-C8-A1HI-01	44.61	39.8	RIGHT
TCGA-AO-A0J3-01	44.54	41.11	RIGHT
TCGA-E2-A1IJ-01	44.51	40.17	RIGHT
TCGA-A2-A0D1-01	44.49	49.93	LEFT
TCGA-AC-A2FO-01	44.49	42.26	LEFT
TCGA-E2-A15R-01	44.49	41.51	RIGHT
TCGA-MS-A51U-01	44.49	41.36	LEFT
TCGA-BH-A1FJ-01	44.48	42.73	RIGHT
TCGA-BH-A8FZ-01	44.44	43.49	LEFT
TCGA-BH-A0BM-01	44.43	39.87	RIGHT
TCGA-BH-A0HF-01	44.42	41.06	RIGHT
TCGA-E2-A15I-01	44.42	41	LEFT
TCGA-LL-A442-01	44.42	40.41	LEFT
TCGA-AR-A2LO-01	44.41	43.07	LEFT
TCGA-D8-A1Y0-01	44.32	43.65	LEFT
TCGA-AC-A3YI-01	44.25	42.11	RIGHT
TCGA-A8-A07E-01	44.24	43.72	LEFT
TCGA-AN-A0FN-01	44.23	41.61	RIGHT
TCGA-AC-A3OD-01	44.16	43.55	LEFT
TCGA-A7-A3IY-01	44.15	40.03	RIGHT
TCGA-EW-A1J2-01	44.12	41.86	RIGHT
TCGA-B6-A0RP-01	44.11	39.66	LEFT
TCGA-BH-A42U-01	44.1	41.51	RIGHT
TCGA-A2-A0T3-01	44.08	44.33	RIGHT
TCGA-BH-A0W3-01	44.07	42.46	LEFT
TCGA-BH-A0HL-01	44.06	42.3	RIGHT
TCGA-BH-A1ET-01	44.05	38.74	LEFT
TCGA-A2-A0SU-01	44.02	40.85	LEFT
TCGA-A1-A0SH-01	44.01	40.83	LEFT
TCGA-OL-A6VR-01	43.99	42.69	RIGHT
TCGA-A2-A0YC-01	43.97	40.79	RIGHT
TCGA-A8-A09V-01	43.93	42.49	RIGHT
TCGA-A7-A26E-01	43.92	41.85	LEFT
TCGA-LL-A73Z-01	43.9	43.58	LEFT
TCGA-BH-A0BO-01	43.9	38.86	LEFT
TCGA-AC-A23G-01	43.87	40.81	RIGHT
TCGA-A2-A259-01	43.87	39.75	LEFT
TCGA-A7-A3IZ-01	43.86	42.81	RIGHT
TCGA-A8-A099-01	43.86	37.57	RIGHT
TCGA-BH-A0BC-01	43.85	42.48	RIGHT
TCGA-E2-A3DX-01	43.82	42.55	RIGHT
TCGA-EW-A1PF-01	43.82	42.4	RIGHT
TCGA-AN-A0XO-01	43.82	41.95	LEFT
TCGA-D8-A1JB-01	43.82	41.4	RIGHT
TCGA-B6-A1KC-01	43.8	40.17	RIGHT
TCGA-BH-A0EI-01	43.77	41.35	RIGHT
TCGA-D8-A73W-01	43.77	39.49	RIGHT
TCGA-A7-A13H-01	43.75	42.85	RIGHT
TCGA-E2-A15F-01	43.75	41.47	LEFT
TCGA-PE-A5DD-01	43.73	43.21	RIGHT
TCGA-D8-A140-01	43.68	41.62	LEFT
TCGA-OL-A66H-01	43.66	39.45	RIGHT
TCGA-A1-A0SF-01	43.65	44.27	LEFT
TCGA-D8-A27V-01	43.64	39.44	RIGHT
TCGA-B6-A0X7-01	43.62	45.27	RIGHT
TCGA-E2-A1BC-01	43.61	41.52	RIGHT
TCGA-AR-A1AU-01	43.58	42.48	RIGHT
TCGA-E2-A1B5-01	43.57	39.56	LEFT
TCGA-AO-A0J5-01	43.54	42.42	RIGHT
TCGA-D8-A1X7-01	43.54	40.16	RIGHT
TCGA-E2-A1IF-01	43.53	40.92	LEFT
TCGA-XX-A89A-01	43.51	43.29	LEFT
TCGA-A1-A0SM-01	43.49	40.57	LEFT
TCGA-A8-A0A6-01	43.49	40.27	LEFT
TCGA-EW-A2FS-01	43.46	44.48	LEFT
TCGA-OL-A6VQ-01	43.44	41.48	RIGHT
TCGA-A7-A425-01	43.43	41.63	RIGHT
TCGA-AR-A2LM-01	43.42	42.41	RIGHT
TCGA-BH-A0BA-01	43.4	42.14	LEFT
TCGA-D8-A13Y-01	43.37	45.21	RIGHT
TCGA-C8-A8HR-01	43.37	44.82	RIGHT
TCGA-AO-A0JA-01	43.37	42.89	RIGHT
TCGA-A2-A0T4-01	43.36	40.51	RIGHT
TCGA-PL-A8LY-01	43.25	44.08	RIGHT
TCGA-E9-A3HO-01	43.22	43.46	LEFT
TCGA-C8-A1HE-01	43.21	41.1	RIGHT
TCGA-GM-A2D9-01	43.2	41.55	LEFT
TCGA-AO-A12A-01	43.17	41.77	RIGHT
TCGA-PE-A5DC-01	43.16	45.46	RIGHT
TCGA-BH-A0W4-01	43.16	43.47	LEFT
TCGA-AC-A2FM-01	43.16	41.85	RIGHT
TCGA-A2-A0CP-01	43.14	40.3	RIGHT
TCGA-BH-A0HA-01	43.13	41.97	RIGHT
TCGA-BH-A0AZ-01	43.13	40.24	RIGHT
TCGA-GM-A5PX-01	43.1	41.01	LEFT
TCGA-E2-A107-01	43.01	41.74	RIGHT
TCGA-E2-A1IO-01	42.99	44.32	RIGHT
TCGA-BH-A0BJ-01	42.98	40.7	LEFT
TCGA-AC-A6IV-01	42.93	43.34	RIGHT
TCGA-A2-A4RW-01	42.87	47.64	RIGHT
TCGA-AC-A2QH-01	42.82	45.52	RIGHT
TCGA-AC-A8OP-01	42.82	43.64	RIGHT
TCGA-GM-A2DA-01	42.82	42.32	RIGHT
TCGA-AC-A8OR-01	42.82	40.32	LEFT
TCGA-AR-A5QM-01	42.78	41.25	LEFT
TCGA-E2-A1IE-01	42.76	43.58	RIGHT
TCGA-BH-A0H3-01	42.76	41.87	LEFT
TCGA-A8-A07S-01	42.76	41.74	LEFT
TCGA-OL-A5RZ-01	42.74	45.9	LEFT
TCGA-A2-A0EM-01	42.74	40.94	RIGHT
TCGA-BH-A0DQ-01	42.69	42.19	RIGHT
TCGA-EW-A424-01	42.67	42.93	RIGHT
TCGA-A2-A0CK-01	42.66	43.07	RIGHT
TCGA-AO-A0JF-01	42.66	40.99	LEFT
TCGA-AC-A3BB-01	42.62	43.06	RIGHT
TCGA-A7-A26H-01	42.58	40.25	LEFT
TCGA-AR-A255-01	42.57	42.68	RIGHT
TCGA-A8-A08G-01	42.55	44.22	LEFT
TCGA-AN-A0FK-01	42.54	39.62	RIGHT
TCGA-A2-A0T6-01	42.53	41.74	LEFT
TCGA-A2-A0YF-01	42.53	38.71	RIGHT
TCGA-GM-A3NY-01	42.52	41.37	LEFT
TCGA-AC-A4ZE-01	42.47	43.17	RIGHT
TCGA-A2-A0CU-01	42.47	43	RIGHT
TCGA-AN-A0XV-01	42.46	41.84	RIGHT
TCGA-A8-A093-01	42.43	41.51	RIGHT
TCGA-AR-A2LE-01	42.43	39.59	RIGHT
TCGA-E2-A15M-01	42.41	42.41	RIGHT
TCGA-AR-A1AX-01	42.39	43.5	LEFT
TCGA-BH-A0B1-01	42.39	40.38	RIGHT
TCGA-E9-A229-01	42.38	43.64	RIGHT
TCGA-E2-A15G-01	42.38	41.38	LEFT
TCGA-AR-A1AV-01	42.38	41.29	LEFT
TCGA-D8-A1JU-01	42.38	40.14	LEFT
TCGA-BH-A0BS-01	42.38	38.76	LEFT
TCGA-E9-A1N9-01	42.36	49	RIGHT
TCGA-E2-A56Z-01	42.36	39.48	RIGHT
TCGA-XX-A899-01	42.35	42.9	RIGHT
TCGA-E2-A1B1-01	42.35	41.79	LEFT
TCGA-Z7-A8R5-01	42.34	41.22	LEFT
TCGA-AC-A2FB-01	42.29	41.77	LEFT
TCGA-A2-A0YD-01	42.27	41.62	LEFT
TCGA-D8-A27P-01	42.25	41.85	RIGHT
TCGA-AO-A12C-01	42.22	41.21	LEFT
TCGA-LQ-A4E4-01	42.21	45.56	RIGHT
TCGA-BH-AB28-01	42.2	42.46	LEFT
TCGA-E2-A10B-01	42.19	41.14	LEFT
TCGA-B6-A0IB-01	42.18	42.75	RIGHT
TCGA-A8-A086-01	42.17	42.4	RIGHT
TCGA-BH-A18N-01	42.15	40.83	LEFT
TCGA-AC-A6IX-01	42.13	42.65	LEFT
TCGA-BH-A18M-01	42.13	41.57	LEFT
TCGA-A2-A0T5-01	42.1	40.74	LEFT
TCGA-AN-A0XW-01	42.09	42.24	LEFT
TCGA-E9-A295-01	42.08	42.93	RIGHT
TCGA-E9-A1R0-01	42.08	41.36	LEFT
TCGA-BH-A0C1-01	42.04	42.09	RIGHT
TCGA-BH-A0B8-01	42.03	42.17	RIGHT
TCGA-BH-A28Q-01	42	41.46	RIGHT
TCGA-BH-A0B0-01	41.99	40.09	LEFT
TCGA-BH-A0BV-01	41.99	39.73	RIGHT
TCGA-AN-A0XP-01	41.99	39.5	RIGHT
TCGA-BH-A0DP-01	41.99	38.15	RIGHT
TCGA-AO-A12E-01	41.98	41.07	RIGHT
TCGA-A2-A0EO-01	41.97	40.73	LEFT
TCGA-OL-A5DA-01	41.94	44.74	RIGHT
TCGA-AN-A0XT-01	41.94	42.65	LEFT
TCGA-D8-A1XF-01	41.93	45.66	LEFT
TCGA-A8-A097-01	41.93	43.19	LEFT
TCGA-S3-AA17-01	41.91	44.73	RIGHT
TCGA-OL-A5RX-01	41.89	42.27	RIGHT
TCGA-EW-A1IX-01	41.88	43.11	RIGHT
TCGA-A2-A3XW-01	41.88	41.83	RIGHT
TCGA-E9-A2JT-01	41.87	43.83	LEFT
TCGA-D8-A1JC-01	41.87	41.45	LEFT
TCGA-A8-A08O-01	41.82	42.11	RIGHT
TCGA-A2-A0CR-01	41.82	41.43	LEFT
TCGA-E9-A1NH-01	41.82	41.25	LEFT
TCGA-D8-A27T-01	41.81	41.1	RIGHT
TCGA-GM-A2DC-01	41.81	40.94	RIGHT
TCGA-AR-A24L-01	41.79	41.71	RIGHT
TCGA-E2-A1L7-01	41.77	45.52	RIGHT
TCGA-S3-AA14-01	41.71	44.22	RIGHT
TCGA-BH-A8FY-01	41.71	40.72	LEFT
TCGA-GM-A2DH-01	41.7	49.12	RIGHT
TCGA-OL-A66N-01	41.69	41.31	LEFT
TCGA-AO-A12G-01	41.67	41.73	RIGHT
TCGA-A2-A0CV-01	41.67	39.9	LEFT
TCGA-EW-A1P3-01	41.66	41.68	RIGHT
TCGA-E9-A5FK-01	41.64	40.69	RIGHT
TCGA-D8-A1JH-01	41.63	42.95	RIGHT
TCGA-A2-A0CZ-01	41.63	41.94	RIGHT
TCGA-EW-A1PE-01	41.61	42.58	LEFT
TCGA-LD-A7W5-01	41.59	45.34	LEFT
TCGA-A8-A095-01	41.58	44.58	LEFT
TCGA-A8-A09A-01	41.58	43.4	LEFT
TCGA-A2-A1FZ-01	41.57	42.45	RIGHT
TCGA-D8-A1XB-01	41.56	42.48	RIGHT
TCGA-E2-A106-01	41.54	38.01	RIGHT
TCGA-D8-A1XY-01	41.53	39.32	LEFT
TCGA-A8-A0A2-01	41.51	41.17	RIGHT
TCGA-BH-A0DK-01	41.5	40.74	LEFT
TCGA-E9-A1QZ-01	41.5	40.29	LEFT
TCGA-E9-A54X-01	41.49	40.22	LEFT
TCGA-AC-A3TN-01	41.49	39.49	RIGHT
TCGA-A8-A091-01	41.48	43.42	RIGHT
TCGA-A8-A09R-01	41.45	43.03	LEFT
TCGA-BH-A0DG-01	41.44	42.45	RIGHT
TCGA-A2-A0EX-01	41.44	40.98	LEFT
TCGA-EW-A1IW-01	41.41	42.65	RIGHT
TCGA-AQ-A04H-01	41.36	43.94	LEFT
TCGA-E2-A10F-01	41.35	41.71	LEFT
TCGA-E2-A1IH-01	41.35	41.59	RIGHT
TCGA-AR-A24M-01	41.33	40.23	LEFT
TCGA-D8-A1XO-01	41.3	41.41	LEFT
TCGA-OL-A5RU-01	41.29	42.09	LEFT
TCGA-AO-A0JB-01	41.29	39.98	LEFT
TCGA-E9-A1R2-01	41.23	43.86	LEFT
TCGA-E9-A22H-01	41.23	41.83	LEFT
TCGA-A7-A0D9-01	41.16	43.69	LEFT
TCGA-C8-A1HL-01	41.16	41.05	LEFT
TCGA-S3-AA11-01	41.12	44.63	RIGHT
TCGA-AR-A2LH-01	41.12	42.97	RIGHT
TCGA-A2-A0EP-01	41.11	43.78	RIGHT
TCGA-D8-A73X-01	41.1	42.41	LEFT
TCGA-OK-A5Q2-01	41.06	43.81	RIGHT
TCGA-A7-A13G-01	41.06	40.93	LEFT
TCGA-BH-A0HQ-01	41.05	41.55	LEFT
TCGA-A7-A4SA-01	41.03	45.88	LEFT
TCGA-A2-A1FX-01	41.03	41.01	RIGHT
TCGA-AC-A3YJ-01	41.03	39.2	RIGHT
TCGA-A8-A08L-01	41.02	47.7	LEFT
TCGA-C8-A12M-01	40.97	42.85	LEFT
TCGA-B6-A0I8-01	40.97	41.61	RIGHT
TCGA-EW-A1P1-01	40.96	43.56	RIGHT
TCGA-E9-A247-01	40.95	43.53	LEFT
TCGA-BH-A0H7-01	40.95	40.75	RIGHT
TCGA-AR-A2LR-01	40.94	45.69	RIGHT
TCGA-BH-A1FE-01	40.93	43.49	LEFT
TCGA-A7-A0CH-01	40.91	40.76	LEFT
TCGA-E2-A109-01	40.9	44.16	RIGHT
TCGA-A7-A0DB-01	40.88	40.84	RIGHT
TCGA-LL-A441-01	40.87	47.77	RIGHT
TCGA-E2-A2P5-01	40.86	45.13	LEFT
TCGA-B6-A0WS-01	40.85	41.24	LEFT
TCGA-E9-A24A-01	40.84	39.59	RIGHT
TCGA-BH-A0C3-01	40.81	42.31	LEFT
TCGA-D8-A1XM-01	40.81	42.02	RIGHT
TCGA-3C-AALJ-01	40.8	45.69	RIGHT
TCGA-E2-A108-01	40.77	42.11	RIGHT
TCGA-BH-A18I-01	40.77	40.8	LEFT
TCGA-BH-A0EB-01	40.75	39.14	RIGHT
TCGA-AC-A2B8-01	40.74	42.09	RIGHT
TCGA-EW-A1PG-01	40.71	40.1	LEFT
TCGA-B6-A0RO-01	40.71	37.52	RIGHT
TCGA-E2-A105-01	40.69	44.21	LEFT
TCGA-LD-A66U-01	40.66	41.39	RIGHT
TCGA-AR-A1AN-01	40.66	40.13	RIGHT
TCGA-5L-AAT0-01	40.63	42.19	RIGHT
TCGA-AQ-A1H3-01	40.57	40.13	RIGHT
TCGA-D8-A1XD-01	40.56	44.34	LEFT
TCGA-A2-A04N-01	40.56	41.78	RIGHT
TCGA-E2-A2P6-01	40.55	41.7	LEFT
TCGA-E2-A15D-01	40.55	40.31	RIGHT
TCGA-B6-A0IG-01	40.52	42.02	LEFT
TCGA-A8-A09Q-01	40.51	43.06	LEFT
TCGA-A7-A5ZW-01	40.51	41.92	RIGHT
TCGA-A8-A07P-01	40.5	38.52	LEFT
TCGA-A1-A0SJ-01	40.43	39.05	LEFT
TCGA-C8-A26Z-01	40.41	42.29	RIGHT
TCGA-B6-A2IU-01	40.41	41.39	RIGHT
TCGA-BH-A0B2-01	40.38	42.27	RIGHT
TCGA-D8-A27L-01	40.32	43.33	RIGHT
TCGA-AN-A041-01	40.32	43.03	LEFT
TCGA-EW-A1J1-01	40.29	39.36	RIGHT
TCGA-A2-A0CL-01	40.25	46.84	RIGHT
TCGA-B6-A0RG-01	40.24	42.86	LEFT
TCGA-A2-A3XZ-01	40.2	43.34	LEFT
TCGA-B6-A40C-01	40.18	44.15	LEFT
TCGA-A2-A25C-01	40.18	43.05	LEFT
TCGA-E2-A14T-01	40.18	42.58	LEFT
TCGA-BH-A204-01	40.18	39.41	LEFT
TCGA-A1-A0SG-01	40.16	40.88	RIGHT
TCGA-B6-A0IP-01	40.15	43.78	LEFT
TCGA-E2-A14Z-01	40.15	43.6	LEFT
TCGA-AR-A5QP-01	40.15	41.62	LEFT
TCGA-BH-A0DH-01	40.15	38.49	LEFT
TCGA-AR-A0TR-01	40.15	38.06	LEFT
TCGA-D8-A1JP-01	40.14	42.77	LEFT
TCGA-BH-A0H0-01	40.13	40.26	RIGHT
TCGA-E2-A10E-01	40.12	41.83	LEFT
TCGA-OL-A66L-01	40.12	40.28	RIGHT
TCGA-E9-A22B-01	40.11	40.48	RIGHT
TCGA-AC-A3QP-01	40.09	41.14	RIGHT
TCGA-EW-A3E8-01	40.08	43.26	LEFT
TCGA-BH-A0B6-01	40.06	41.68	LEFT
TCGA-AC-A62Y-01	40.06	40.2	RIGHT
TCGA-E2-A15S-01	40.05	44.07	LEFT
TCGA-BH-A18F-01	40.05	43.35	RIGHT
TCGA-A7-A4SB-01	40.05	42.49	RIGHT
TCGA-A2-A04X-01	40.05	42.47	LEFT
TCGA-C8-A132-01	40.04	43.14	LEFT
TCGA-A7-A26J-01	40.04	43.01	LEFT
TCGA-AC-A2FE-01	40.03	41.88	RIGHT
TCGA-EW-A1IY-01	40	40.08	RIGHT
TCGA-E2-A1IN-01	39.98	41.29	RIGHT
TCGA-A2-A4S2-01	39.98	41.18	RIGHT
TCGA-GM-A2DO-01	39.97	43.69	RIGHT
TCGA-LL-A5YM-01	39.9	37.16	LEFT
TCGA-BH-A18H-01	39.87	39.42	RIGHT
TCGA-EW-A1J3-01	39.86	42.68	LEFT
TCGA-AO-A0J8-01	39.85	40.51	RIGHT
TCGA-EW-A2FV-01	39.83	41.91	LEFT
TCGA-BH-A0B5-01	39.82	44.19	LEFT
TCGA-A2-A0EV-01	39.82	41.22	LEFT
TCGA-A1-A0SI-01	39.8	44.72	RIGHT
TCGA-AO-A0J9-01	39.8	42.73	RIGHT
TCGA-EW-A1J5-01	39.79	43.49	LEFT
TCGA-S3-AA15-01	39.78	44.09	RIGHT
TCGA-A8-A08H-01	39.77	42.74	LEFT
TCGA-AN-A0FY-01	39.76	46.03	LEFT
TCGA-D8-A27K-01	39.76	42.31	LEFT
TCGA-GM-A2DI-01	39.76	41.54	LEFT
TCGA-B6-A401-01	39.75	44.01	LEFT
TCGA-BH-A1ES-01	39.74	42.82	RIGHT
TCGA-AR-A0TQ-01	39.72	43.47	RIGHT
TCGA-A2-A0CQ-01	39.72	42.5	RIGHT
TCGA-AO-A03R-01	39.72	42.06	LEFT
TCGA-A2-A04R-01	39.7	41.64	LEFT
TCGA-E2-A1BD-01	39.68	42.7	RIGHT
TCGA-BH-A0E7-01	39.68	39.91	LEFT
TCGA-E9-A228-01	39.65	43.54	RIGHT
TCGA-D8-A73U-01	39.64	41.19	LEFT
TCGA-B6-A0RN-01	39.63	40.74	RIGHT
TCGA-BH-A0C7-01	39.62	44.11	LEFT
TCGA-E9-A1NE-01	39.59	43.23	RIGHT
TCGA-E2-A1B4-01	39.58	40.85	LEFT
TCGA-E2-A572-01	39.58	36.06	LEFT
TCGA-C8-A138-01	39.54	42.76	LEFT
TCGA-A8-A084-01	39.54	42.69	LEFT
TCGA-A2-A1FW-01	39.47	43.23	RIGHT
TCGA-EW-A2FW-01	39.47	42.29	RIGHT
TCGA-BH-A0HN-01	39.47	41.84	LEFT
TCGA-PE-A5DE-01	39.47	40.79	LEFT
TCGA-AQ-A04J-01	39.45	46.66	RIGHT
TCGA-B6-A0IC-01	39.45	41.15	RIGHT
TCGA-BH-A0HK-01	39.43	39.54	RIGHT
TCGA-AQ-A0Y5-01	39.42	40.15	RIGHT
TCGA-A8-A09D-01	39.38	43.42	RIGHT
TCGA-E2-A15C-01	39.38	41.95	RIGHT
TCGA-A7-A6VX-01	39.36	41.46	LEFT
TCGA-AN-A0XS-01	39.32	42.97	LEFT
TCGA-EW-A6SC-01	39.31	42.25	LEFT
TCGA-BH-A0H6-01	39.31	41.86	RIGHT
TCGA-AO-A126-01	39.28	42.45	RIGHT
TCGA-BH-A1FU-01	39.24	44.27	RIGHT
TCGA-B6-A1KN-01	39.23	42.36	RIGHT
TCGA-EW-A423-01	39.22	41.4	LEFT
TCGA-E9-A1RI-01	39.22	40.96	LEFT
TCGA-E9-A1N4-01	39.21	41.1	LEFT
TCGA-D8-A1XA-01	39.2	41.38	LEFT
TCGA-E2-A156-01	39.18	40.75	LEFT
TCGA-BH-A0B7-01	39.16	43.01	RIGHT
TCGA-C8-A12O-01	39.16	42.04	LEFT
TCGA-AC-A5XU-01	39.14	43.51	LEFT
TCGA-AR-A0TX-01	39.13	44.24	LEFT
TCGA-A8-A07G-01	39.13	41.09	RIGHT
TCGA-GM-A2DN-01	39.1	42.37	LEFT
TCGA-BH-A0DT-01	39.09	41.49	RIGHT
TCGA-AC-A6NO-01	39.07	43.94	RIGHT
TCGA-A2-A04Y-01	39.06	43.25	RIGHT
TCGA-B6-A0RM-01	39.06	41.24	LEFT
TCGA-AR-A24V-01	39.05	41.21	RIGHT
TCGA-A2-A0EN-01	39.05	40.95	RIGHT
TCGA-BH-A0HX-01	39.02	42.12	LEFT
TCGA-C8-A1HK-01	39	45.87	RIGHT
TCGA-EW-A1P0-01	38.96	41.78	LEFT
TCGA-OL-A97C-01	38.93	44.69	LEFT
TCGA-D8-A27W-01	38.91	41.66	RIGHT
TCGA-AR-A24P-01	38.91	40.89	LEFT
TCGA-D8-A1XR-01	38.9	40.86	RIGHT
TCGA-EW-A1P6-01	38.85	42.35	RIGHT
TCGA-AR-A24Z-01	38.82	44.81	LEFT
TCGA-AR-A2LJ-01	38.82	41.04	LEFT
TCGA-BH-A208-01	38.82	40.86	LEFT
TCGA-BH-A18K-01	38.81	42.49	LEFT
TCGA-A8-A081-01	38.8	45.57	RIGHT
TCGA-A2-A3XY-01	38.79	47.18	LEFT
TCGA-E9-A1N5-01	38.78	43.02	LEFT
TCGA-B6-A40B-01	38.78	42.28	LEFT
TCGA-AR-A1AW-01	38.77	44.92	LEFT
TCGA-A8-A09C-01	38.77	44.46	RIGHT
TCGA-A7-A13F-01	38.77	40.83	RIGHT
TCGA-E2-A153-01	38.75	40.89	LEFT
TCGA-B6-A0RU-01	38.74	47.8	RIGHT
TCGA-4H-AAAK-01	38.72	44.25	LEFT
TCGA-E9-A22E-01	38.72	40.71	RIGHT
TCGA-A2-A0CT-01	38.7	41.47	RIGHT
TCGA-GM-A5PV-01	38.7	40.57	RIGHT
TCGA-AO-A0JC-01	38.69	42.78	RIGHT
TCGA-A2-A0SY-01	38.69	41.31	LEFT
TCGA-AO-A12H-01	38.67	39.53	RIGHT
TCGA-E9-A3X8-01	38.67	39.43	LEFT
TCGA-A7-A0CD-01	38.66	39.49	LEFT
TCGA-BH-A0W7-01	38.64	42.74	LEFT
TCGA-E2-A1L8-01	38.63	40.1	LEFT
TCGA-A7-A0CE-01	38.62	43.35	LEFT
TCGA-A1-A0SN-01	38.62	42.71	LEFT
TCGA-AC-A23C-01	38.6	42.58	LEFT
TCGA-B6-A0IM-01	38.59	41.77	RIGHT
TCGA-AR-A24R-01	38.59	40.57	RIGHT
TCGA-AN-A03X-01	38.58	37.03	LEFT
TCGA-C8-A26W-01	38.57	46.26	LEFT
TCGA-AO-A0JI-01	38.57	41.23	LEFT
TCGA-BH-A1EW-01	38.56	42.45	LEFT
TCGA-C8-A273-01	38.55	39.49	RIGHT
TCGA-AR-A0U2-01	38.51	45.89	LEFT
TCGA-B6-A0WV-01	38.46	41.98	RIGHT
TCGA-AN-A0FF-01	38.46	41.78	LEFT
TCGA-AC-A3W5-01	38.44	43.95	RIGHT
TCGA-BH-A5J0-01	38.44	41	LEFT
TCGA-E9-A1R3-01	38.43	40.02	RIGHT
TCGA-D8-A1X9-01	38.4	40.19	LEFT
TCGA-D8-A1JD-01	38.37	44.74	LEFT
TCGA-BH-A0BQ-01	38.36	40.98	LEFT
TCGA-GM-A2DM-01	38.36	39.53	RIGHT
TCGA-A8-A06Z-01	38.36	39.35	RIGHT
TCGA-B6-A0IO-01	38.34	44.08	LEFT
TCGA-E9-A1NG-01	38.3	39.89	RIGHT
TCGA-A8-A06P-01	38.3	39.64	RIGHT
TCGA-BH-A0H5-01	38.25	41.8	RIGHT
TCGA-C8-A12X-01	38.25	39.66	LEFT
TCGA-D8-A1JN-01	38.24	40.79	LEFT
TCGA-BH-A1FL-01	38.23	43.75	LEFT
TCGA-AR-A1AO-01	38.23	43.37	LEFT
TCGA-LL-A9Q3-01	38.21	38.09	LEFT
TCGA-AR-A24S-01	38.2	47.19	RIGHT
TCGA-EW-A1IZ-01	38.18	42.4	LEFT
TCGA-AR-A250-01	38.17	44.63	LEFT
TCGA-AN-A0XN-01	38.16	40.13	RIGHT
TCGA-GM-A2DD-01	38.15	45.39	RIGHT
TCGA-AC-A3QQ-01	38.1	40.1	RIGHT
TCGA-AO-A1KS-01	38.08	42.16	LEFT
TCGA-E2-A10A-01	38.08	41.63	LEFT
TCGA-AN-A0FT-01	38.07	39.84	RIGHT
TCGA-E2-A15L-01	38.06	41.75	RIGHT
TCGA-A2-A0EY-01	38.05	43.92	RIGHT
TCGA-BH-A0BD-01	38.03	42.58	LEFT
TCGA-AR-A0TY-01	38.02	45.99	RIGHT
TCGA-BH-A18J-01	38.02	43.3	RIGHT
TCGA-BH-A1F5-01	38	37.42	RIGHT
TCGA-A8-A07F-01	37.99	43.02	LEFT
TCGA-GM-A2DK-01	37.99	41.75	RIGHT
TCGA-AC-A23E-01	37.99	40.36	RIGHT
TCGA-D8-A1X5-01	37.98	39.91	RIGHT
TCGA-E2-A576-01	37.96	43.69	LEFT
TCGA-3C-AALI-01	37.88	43.03	RIGHT
TCGA-E2-A15T-01	37.87	42.74	LEFT
TCGA-BH-A0BP-01	37.87	40.88	LEFT
TCGA-E9-A1R5-01	37.87	38.44	RIGHT
TCGA-AR-A2LK-01	37.86	44.59	RIGHT
TCGA-A8-A07J-01	37.86	38.76	RIGHT
TCGA-AR-A0U3-01	37.81	42.17	LEFT
TCGA-A8-A096-01	37.81	41.16	RIGHT
TCGA-OL-A5D6-01	37.8	42.5	LEFT
TCGA-BH-A1EO-01	37.79	40.96	RIGHT
TCGA-B6-A408-01	37.77	41.76	LEFT
TCGA-EW-A1PD-01	37.76	44.82	RIGHT
TCGA-E2-A15H-01	37.76	43.75	RIGHT
TCGA-3C-AALK-01	37.76	43.08	RIGHT
TCGA-BH-A0DX-01	37.7	42.78	LEFT
TCGA-E2-A152-01	37.7	42.38	RIGHT
TCGA-B6-A0WX-01	37.69	44.96	LEFT
TCGA-A2-A25E-01	37.66	43.07	LEFT
TCGA-A1-A0SB-01	37.65	45.12	LEFT
TCGA-EW-A1OY-01	37.65	44.09	LEFT
TCGA-A8-A090-01	37.64	40.55	RIGHT
TCGA-E9-A2JS-01	37.63	45.34	LEFT
TCGA-A8-A07B-01	37.63	41.83	LEFT
TCGA-A2-A4RX-01	37.62	43.56	RIGHT
TCGA-EW-A1J6-01	37.62	42.15	RIGHT
TCGA-E9-A226-01	37.61	42.8	LEFT
TCGA-AC-A7VB-01	37.61	41.63	RIGHT
TCGA-AC-A3TM-01	37.6	44.24	RIGHT
TCGA-A8-A0AB-01	37.59	44.12	LEFT
TCGA-LL-A5YN-01	37.57	43.66	RIGHT
TCGA-A8-A082-01	37.56	42.55	RIGHT
TCGA-C8-A12N-01	37.56	41.04	RIGHT
TCGA-C8-A8HQ-01	37.54	43.53	LEFT
TCGA-A2-A0SW-01	37.53	43.16	RIGHT
TCGA-AN-A0FW-01	37.49	41.09	LEFT
TCGA-EW-A6SA-01	37.47	44.5	LEFT
TCGA-C8-A12Q-01	37.47	41.38	LEFT
TCGA-D8-A141-01	37.45	41.84	RIGHT
TCGA-A8-A08I-01	37.43	43.58	RIGHT
TCGA-E9-A22A-01	37.43	42.67	RIGHT
TCGA-AN-A0FX-01	37.42	45.77	LEFT
TCGA-AQ-A04L-01	37.41	44.67	RIGHT
TCGA-B6-A0X0-01	37.41	40.88	RIGHT
TCGA-A8-A06O-01	37.38	44.21	LEFT
TCGA-B6-A0WZ-01	37.37	42.23	RIGHT
TCGA-EW-A1P7-01	37.36	43.86	RIGHT
TCGA-AC-A5XS-01	37.36	41.4	LEFT
TCGA-BH-A0BL-01	37.33	45.82	RIGHT
TCGA-AR-A24X-01	37.33	42.2	RIGHT
TCGA-BH-A0AY-01	37.33	42.02	LEFT
TCGA-BH-A0HW-01	37.25	42.22	LEFT
TCGA-A8-A08J-01	37.19	42.74	RIGHT
TCGA-C8-A274-01	37.16	43.63	RIGHT
TCGA-E2-A570-01	37.16	42.34	RIGHT
TCGA-A8-A07I-01	37.15	42.93	LEFT
TCGA-A8-A09K-01	37.15	42.31	LEFT
TCGA-C8-A130-01	37.14	46.61	LEFT
TCGA-D8-A27G-01	37.14	42.55	LEFT
TCGA-AN-A046-01	37.14	39.72	RIGHT
TCGA-LL-A6FQ-01	37.12	39.94	RIGHT
TCGA-A1-A0SP-01	37.1	50.5	RIGHT
TCGA-BH-A0BT-01	37.1	43.56	RIGHT
TCGA-E2-A14V-01	37.09	45.47	LEFT
TCGA-E2-A14S-01	37.08	43.88	LEFT
TCGA-BH-A6R9-01	37.08	42.21	LEFT
TCGA-D8-A1JE-01	37.08	39.55	LEFT
TCGA-A8-A09G-01	37.07	44.7	RIGHT
TCGA-LD-A9QF-01	37.04	43.64	LEFT
TCGA-5T-A9QA-01	37.04	42.81	LEFT
TCGA-E9-A1RA-01	37.03	43.36	LEFT
TCGA-AN-A0FZ-01	37	44.46	LEFT
TCGA-B6-A0IE-01	36.98	43.62	LEFT
TCGA-AC-A3EH-01	36.96	43.01	RIGHT
TCGA-B6-A0X5-01	36.96	40.3	LEFT
TCGA-BH-A0HY-01	36.93	43.38	LEFT
TCGA-B6-A0RI-01	36.93	43.11	RIGHT
TCGA-D8-A1XS-01	36.92	43.55	LEFT
TCGA-B6-A0I6-01	36.9	49.73	LEFT
TCGA-BH-A0E2-01	36.9	41.78	RIGHT
TCGA-E9-A1R7-01	36.89	44.37	RIGHT
TCGA-BH-A0AU-01	36.86	43.55	LEFT
TCGA-A7-A2KD-01	36.85	44.06	RIGHT
TCGA-AR-A2LL-01	36.84	44.24	LEFT
TCGA-BH-A1F0-01	36.84	43.75	LEFT
TCGA-A2-A0T1-01	36.8	43.18	RIGHT
TCGA-A7-A4SE-01	36.77	44.97	LEFT
TCGA-AO-A03L-01	36.77	41.79	RIGHT
TCGA-E2-A154-01	36.76	41.26	LEFT
TCGA-D8-A1Y2-01	36.75	41.82	RIGHT
TCGA-BH-A0B4-01	36.73	41.14	LEFT
TCGA-EW-A2FR-01	36.72	44.78	RIGHT
TCGA-AO-A03N-01	36.72	41.12	LEFT
TCGA-AN-A0XR-01	36.71	42.78	LEFT
TCGA-WT-AB44-01	36.7	39.46	LEFT
TCGA-AC-A5EH-01	36.64	44.39	LEFT
TCGA-BH-A18P-01	36.64	43.66	LEFT
TCGA-A8-A085-01	36.64	42.84	LEFT
TCGA-A2-A04V-01	36.63	42.28	RIGHT
TCGA-LL-A50Y-01	36.61	39.59	RIGHT
TCGA-OL-A66O-01	36.53	42.12	RIGHT
TCGA-S3-A6ZH-01	36.5	42.08	LEFT
TCGA-E9-A1R6-01	36.46	41.34	RIGHT
TCGA-EW-A1P5-01	36.44	41.34	RIGHT
TCGA-S3-A6ZF-01	36.43	42.93	RIGHT
TCGA-BH-A0BR-01	36.42	42.81	LEFT
TCGA-A2-A0YG-01	36.38	45.58	LEFT
TCGA-LL-A740-01	36.38	43.56	RIGHT
TCGA-BH-A0H9-01	36.38	39.71	RIGHT
TCGA-E2-A1B0-01	36.36	42.27	LEFT
TCGA-AC-A2BM-01	36.34	42.11	LEFT
TCGA-BH-A0AW-01	36.3	43.79	LEFT
TCGA-EW-A1OV-01	36.29	45.17	RIGHT
TCGA-E9-A1RE-01	36.29	44.44	LEFT
TCGA-AN-A049-01	36.29	42.18	LEFT
TCGA-C8-A12T-01	36.28	45.06	LEFT
TCGA-A8-A08F-01	36.28	42.69	RIGHT
TCGA-AN-A03Y-01	36.28	42.39	LEFT
TCGA-B6-A0I5-01	36.26	40.65	RIGHT
TCGA-B6-A3ZX-01	36.24	45.66	LEFT
TCGA-A8-A092-01	36.15	45.26	LEFT
TCGA-A8-A06T-01	36.14	41.27	LEFT
TCGA-AO-A0J7-01	36.07	38.86	LEFT
TCGA-BH-A209-01	36.04	45.69	LEFT
TCGA-E9-A1RF-01	36.04	43.94	LEFT
TCGA-BH-A0HU-01	36.03	46.83	RIGHT
TCGA-A8-A09N-01	36.03	41.82	RIGHT
TCGA-BH-A1F8-01	36	40.31	LEFT
TCGA-A7-A0DC-01	35.99	43.96	RIGHT
TCGA-E2-A1L9-01	35.99	41.4	RIGHT
TCGA-BH-A18L-01	35.98	42.3	LEFT
TCGA-GM-A2DB-01	35.97	45.5	LEFT
TCGA-C8-A133-01	35.96	37.04	RIGHT
TCGA-AO-A03P-01	35.95	42.59	RIGHT
TCGA-A8-A09T-01	35.93	40.49	LEFT
TCGA-C8-A26Y-01	35.9	43.34	LEFT
TCGA-OL-A5D8-01	35.88	42.79	LEFT
TCGA-E2-A155-01	35.86	41.22	LEFT
TCGA-A2-A0D4-01	35.85	41.4	LEFT
TCGA-A8-A09W-01	35.85	40.03	RIGHT
TCGA-5L-AAT1-01	35.83	41.85	LEFT
TCGA-PL-A8LV-01	35.82	44.91	RIGHT
TCGA-AO-A12D-01	35.81	44.14	LEFT
TCGA-D8-A1XZ-01	35.77	46.44	RIGHT
TCGA-E2-A15O-01	35.77	44.85	LEFT
TCGA-C8-A12Y-01	35.77	40.59	LEFT
TCGA-D8-A27R-01	35.76	46.34	RIGHT
TCGA-E9-A1NI-01	35.74	43.48	LEFT
TCGA-A8-A06Y-01	35.69	39.11	LEFT
TCGA-BH-A0DS-01	35.68	40.69	RIGHT
TCGA-B6-A0RH-01	35.62	40.44	LEFT
TCGA-BH-A203-01	35.61	46.11	RIGHT
TCGA-A8-A08A-01	35.61	40.58	LEFT
TCGA-C8-A12P-01	35.59	45.85	LEFT
TCGA-AQ-A1H2-01	35.59	40.91	RIGHT
TCGA-AO-A03M-01	35.58	42.67	LEFT
TCGA-D8-A1J9-01	35.54	41.07	LEFT
TCGA-E9-A1R4-01	35.53	40.47	LEFT
TCGA-E2-A15K-01	35.51	44.11	RIGHT
TCGA-AR-A0TZ-01	35.51	42.58	LEFT
TCGA-OL-A5RY-01	35.5	43.15	RIGHT
TCGA-BH-A18Q-01	35.49	47.12	LEFT
TCGA-GM-A2DL-01	35.49	41.99	LEFT
TCGA-E2-A1LE-01	35.43	46.33	RIGHT
TCGA-A2-A04P-01	35.43	44.56	LEFT
TCGA-E2-A15A-01	35.38	42.47	LEFT
TCGA-B6-A0IQ-01	35.33	49.52	LEFT
TCGA-BH-A1EV-01	35.32	45.95	LEFT
TCGA-BH-A0BF-01	35.31	43.71	RIGHT
TCGA-BH-A1FD-01	35.3	42.8	LEFT
TCGA-AC-A8OQ-01	35.29	47.74	RIGHT
TCGA-E2-A1LA-01	35.27	43.35	RIGHT
TCGA-A2-A0EU-01	35.24	41.39	RIGHT
TCGA-EW-A1PC-01	35.22	46.93	LEFT
TCGA-B6-A0I9-01	35.2	42.33	LEFT
TCGA-B6-A400-01	35.19	45.79	LEFT
TCGA-C8-A12W-01	35.18	44.78	LEFT
TCGA-A8-A09M-01	35.18	41.92	RIGHT
TCGA-A2-A25D-01	35.17	43	RIGHT
TCGA-V7-A7HQ-01	35.14	39.75	RIGHT
TCGA-AN-A0FD-01	35.13	42.26	LEFT
TCGA-LL-A73Y-01	35.12	43.85	RIGHT
TCGA-BH-A1F2-01	35.12	40.64	LEFT
TCGA-A8-A09E-01	35.08	43.59	LEFT
TCGA-BH-A0E6-01	35.06	43.59	LEFT
TCGA-A8-A07L-01	35.03	45.19	RIGHT
TCGA-JL-A3YX-01	35.03	44.16	LEFT
TCGA-AO-A1KT-01	35	42.64	LEFT
TCGA-A8-A08T-01	35	41.84	RIGHT
TCGA-A2-A0ST-01	34.97	45.28	RIGHT
TCGA-A8-A0A1-01	34.97	41.47	RIGHT
TCGA-BH-A0RX-01	34.95	46.86	LEFT
TCGA-AN-A0AR-01	34.94	50.25	RIGHT
TCGA-A2-A0YH-01	34.93	41.68	LEFT
TCGA-D8-A1JF-01	34.88	41.69	LEFT
TCGA-E2-A14P-01	34.85	46.47	RIGHT
TCGA-AO-A125-01	34.83	40.87	LEFT
TCGA-A2-A4S3-01	34.82	44.86	LEFT
TCGA-BH-A0GY-01	34.82	44.3	LEFT
TCGA-HN-A2NL-01	34.81	49.81	LEFT
TCGA-AR-A0TS-01	34.81	46.73	RIGHT
TCGA-BH-A2L8-01	34.81	43.53	RIGHT
TCGA-A2-A0EQ-01	34.79	48.43	LEFT
TCGA-A8-A0A9-01	34.76	42.71	LEFT
TCGA-A2-A04W-01	34.7	40.52	RIGHT
TCGA-AR-A24H-01	34.66	45.25	RIGHT
TCGA-E2-A1AZ-01	34.6	46.28	LEFT
TCGA-AR-A1AT-01	34.6	42.98	LEFT
TCGA-E2-A14O-01	34.6	39.05	LEFT
TCGA-E9-A22D-01	34.59	41.84	RIGHT
TCGA-C8-A1HG-01	34.56	42.34	RIGHT
TCGA-AR-A24N-01	34.56	40.8	LEFT
TCGA-E2-A10C-01	34.54	42.67	LEFT
TCGA-A8-A06U-01	34.54	42.66	RIGHT
TCGA-D8-A1JM-01	34.53	43.26	RIGHT
TCGA-AR-A1AP-01	34.53	42.28	LEFT
TCGA-EW-A6S9-01	34.52	42.95	RIGHT
TCGA-A8-A083-01	34.48	39.26	LEFT
TCGA-S3-AA12-01	34.41	42.18	LEFT
TCGA-LL-A5YL-01	34.41	40.71	RIGHT
TCGA-E9-A1RB-01	34.4	44.88	LEFT
TCGA-A8-A07Z-01	34.39	39.07	LEFT
TCGA-C8-A1HJ-01	34.38	46.78	RIGHT
TCGA-BH-A202-01	34.38	42.48	LEFT
TCGA-Z7-A8R6-01	34.37	46.45	LEFT
TCGA-BH-A0HB-01	34.36	43.07	RIGHT
TCGA-A8-A076-01	34.35	44.57	LEFT
TCGA-AQ-A54O-01	34.34	42.54	RIGHT
TCGA-BH-A0DD-01	34.33	44.88	RIGHT
TCGA-AR-A24U-01	34.31	42.01	LEFT
TCGA-E2-A1B6-01	34.26	51.27	LEFT
TCGA-BH-A1FG-01	34.25	39.78	LEFT
TCGA-A7-A6VV-01	34.22	45.42	RIGHT
TCGA-BH-A18R-01	34.19	44.83	RIGHT
TCGA-A2-A0ET-01	34.16	36.61	RIGHT
TCGA-C8-A1HN-01	34.14	42.71	LEFT
TCGA-D8-A1JG-01	34.11	43.98	RIGHT
TCGA-E9-A1RC-01	34.09	40.98	RIGHT
TCGA-BH-A0BZ-01	34.06	43.16	LEFT
TCGA-AR-A254-01	33.99	41.53	LEFT
TCGA-EW-A3U0-01	33.98	46.22	LEFT
TCGA-A8-A08Z-01	33.97	41.44	LEFT
TCGA-E9-A6HE-01	33.95	42.77	RIGHT
TCGA-BH-A18U-01	33.94	41.62	LEFT
TCGA-A2-A04Q-01	33.93	45.18	RIGHT
TCGA-E2-A1LS-01	33.91	40.85	RIGHT
TCGA-AN-A0FV-01	33.89	42.41	RIGHT
TCGA-C8-A26X-01	33.85	42.78	RIGHT
TCGA-E9-A1N8-01	33.83	48.14	RIGHT
TCGA-A2-A3XS-01	33.82	48.8	LEFT
TCGA-AO-A0JE-01	33.81	42.65	RIGHT
TCGA-D8-A27N-01	33.8	42.06	RIGHT
TCGA-A2-A0SX-01	33.79	46.55	LEFT
TCGA-A8-A08B-01	33.79	41.57	RIGHT
TCGA-AO-A0JD-01	33.77	42.93	LEFT
TCGA-E9-A1NF-01	33.77	41.29	RIGHT
TCGA-AO-A0JM-01	33.76	41.44	RIGHT
TCGA-AC-A7VC-01	33.75	46.13	LEFT
TCGA-BH-A1FN-01	33.75	43.63	RIGHT
TCGA-LL-A7T0-01	33.71	47.21	LEFT
TCGA-E2-A1LG-01	33.68	44.17	LEFT
TCGA-A8-A08S-01	33.62	41.21	LEFT
TCGA-AO-A0JL-01	33.6	46.39	LEFT
TCGA-AR-A0TT-01	33.57	45.25	RIGHT
TCGA-C8-A8HP-01	33.49	43.95	LEFT
TCGA-E9-A1RG-01	33.49	42.2	RIGHT
TCGA-BH-A1EN-01	33.49	39.22	RIGHT
TCGA-PL-A8LZ-01	33.47	44.62	LEFT
TCGA-OL-A66P-01	33.47	41.95	RIGHT
TCGA-LL-A6FP-01	33.42	36.28	RIGHT
TCGA-AC-A62V-01	33.39	40.25	RIGHT
TCGA-A7-A0CJ-01	33.38	44.6	LEFT
TCGA-AO-A1KP-01	33.37	40.88	LEFT
TCGA-A7-A26G-01	33.35	44.77	RIGHT
TCGA-D8-A1JS-01	33.31	37.98	RIGHT
TCGA-A8-A09I-01	33.3	43.02	RIGHT
TCGA-OL-A5RW-01	33.27	46.48	RIGHT
TCGA-B6-A0RT-01	33.24	46.78	RIGHT
TCGA-AR-A0TV-01	33.23	42.3	LEFT
TCGA-S3-A6ZG-01	33.22	42.76	LEFT
TCGA-A1-A0SO-01	33.15	51.23	RIGHT
TCGA-AR-A24Q-01	33.13	44.59	LEFT
TCGA-B6-A0WW-01	33.09	41.36	RIGHT
TCGA-A8-A07W-01	33.08	42.16	LEFT
TCGA-D8-A1Y1-01	33.03	42.5	LEFT
TCGA-AN-A0AS-01	32.99	39.95	LEFT
TCGA-E9-A248-01	32.97	46.21	RIGHT
TCGA-A2-A25F-01	32.93	44.52	RIGHT
TCGA-EW-A1OZ-01	32.9	44.86	LEFT
TCGA-A8-A06N-01	32.9	41.65	LEFT
TCGA-D8-A13Z-01	32.86	49.81	RIGHT
TCGA-BH-A1EY-01	32.83	41.73	LEFT
TCGA-D8-A147-01	32.81	46.57	RIGHT
TCGA-D8-A1XJ-01	32.79	43.6	LEFT
TCGA-LL-A5YO-01	32.78	44.77	LEFT
TCGA-A8-A08P-01	32.78	43.87	RIGHT
TCGA-BH-A6R8-01	32.68	40.52	LEFT
TCGA-A8-A07U-01	32.66	43.09	RIGHT
TCGA-A2-A0YT-01	32.66	42.11	LEFT
TCGA-AR-A1AY-01	32.64	47.77	LEFT
TCGA-A8-A075-01	32.64	42.66	LEFT
TCGA-BH-A1EX-01	32.63	42.07	RIGHT
TCGA-E2-A159-01	32.6	47.78	LEFT
TCGA-D8-A142-01	32.58	46.87	LEFT
TCGA-E9-A243-01	32.57	41.9	RIGHT
TCGA-LL-A8F5-01	32.55	44.4	RIGHT
TCGA-B6-A0IA-01	32.55	37.37	RIGHT
TCGA-C8-A26V-01	32.53	42.36	RIGHT
TCGA-E2-A15J-01	32.53	41.01	LEFT
TCGA-AO-A1KQ-01	32.5	43.61	LEFT
TCGA-A8-A0A7-01	32.49	42.29	RIGHT
TCGA-D8-A1JJ-01	32.48	42.13	RIGHT
TCGA-C8-A275-01	32.46	44.41	LEFT
TCGA-AN-A04C-01	32.44	46.75	LEFT
TCGA-C8-A12L-01	32.44	44.74	RIGHT
TCGA-AR-A0U1-01	32.42	45.9	LEFT
TCGA-E2-A1LH-01	32.4	42.48	RIGHT
TCGA-LL-A5YP-01	32.37	46.07	RIGHT
TCGA-D8-A27F-01	32.36	47.47	RIGHT
TCGA-BH-A42T-01	32.31	43.85	LEFT
TCGA-A8-A079-01	32.31	43.58	LEFT
TCGA-A8-A06X-01	32.29	45.38	RIGHT
TCGA-E9-A1NC-01	32.28	43.7	RIGHT
TCGA-E9-A1N6-01	32.26	44.42	LEFT
TCGA-D8-A1XW-01	32.2	44.49	LEFT
TCGA-GI-A2C9-01	32.14	48.1	RIGHT
TCGA-C8-A134-01	32.14	46.33	LEFT
TCGA-E9-A249-01	32.11	41.45	LEFT
TCGA-B6-A0IK-01	32.07	41.32	LEFT
TCGA-AR-A24K-01	32.04	42.62	LEFT
TCGA-E9-A5FL-01	32.03	42.19	RIGHT
TCGA-AN-A0AJ-01	32	45.99	LEFT
TCGA-A7-A56D-01	32	40.54	LEFT
TCGA-UL-AAZ6-01	31.93	44.7	RIGHT
TCGA-E2-A9RU-01	31.9	43.05	RIGHT
TCGA-E2-A1LB-01	31.89	44.03	RIGHT
TCGA-A7-A26I-01	31.86	44.41	LEFT
TCGA-C8-A12U-01	31.82	46.45	RIGHT
TCGA-A2-A25B-01	31.76	42.43	LEFT
TCGA-AN-A0XU-01	31.71	47.8	LEFT
TCGA-C8-A135-01	31.7	45.25	LEFT
TCGA-A8-A06R-01	31.67	44.62	RIGHT
TCGA-AO-A12F-01	31.63	49.01	RIGHT
TCGA-A8-A08X-01	31.6	44.29	LEFT
TCGA-C8-A12V-01	31.56	45.17	RIGHT
TCGA-LL-A7SZ-01	31.46	42.11	LEFT
TCGA-AR-A1AS-01	31.42	41.19	LEFT
TCGA-A8-A08C-01	31.42	39.25	LEFT
TCGA-A2-A04T-01	31.39	45.83	LEFT
TCGA-D8-A27H-01	31.38	42.51	RIGHT
TCGA-JL-A3YW-01	31.36	44.66	LEFT
TCGA-AR-A251-01	31.34	49.91	LEFT
TCGA-A7-A4SF-01	31.25	43.32	RIGHT
TCGA-A2-A0CS-01	31.25	39.93	LEFT
TCGA-A2-A0CY-01	31.21	45.19	LEFT
TCGA-A7-A13D-01	31.12	48.54	RIGHT
TCGA-EW-A1PH-01	31.11	47.32	RIGHT
TCGA-AR-A0TP-01	31.1	45.47	LEFT
TCGA-BH-A0WA-01	31.08	46.7	RIGHT
TCGA-D8-A1J8-01	31.08	40.62	RIGHT
TCGA-AR-A1AQ-01	31.03	46.84	RIGHT
TCGA-A8-A07R-01	31.01	46.71	LEFT
TCGA-D8-A1XT-01	30.94	44.4	RIGHT
TCGA-AN-A04D-01	30.89	51.04	LEFT
TCGA-D8-A1JL-01	30.88	45.35	LEFT
TCGA-AN-A0AM-01	30.87	41.86	LEFT
TCGA-EW-A6SD-01	30.8	45.38	LEFT
TCGA-E2-A14X-01	30.76	44.97	RIGHT
TCGA-B6-A0I1-01	30.75	45.7	LEFT
TCGA-B6-A0RS-01	30.74	41.84	LEFT
TCGA-A2-A0D3-01	30.69	40.61	LEFT
TCGA-E9-A1NA-01	30.66	42.87	LEFT
TCGA-A8-A09X-01	30.6	43.12	LEFT
TCGA-E9-A54Y-01	30.6	38.31	RIGHT
TCGA-A2-A0SV-01	30.59	42.39	RIGHT
TCGA-AR-A1AJ-01	30.57	45.4	RIGHT
TCGA-AN-A0AK-01	30.56	43.86	LEFT
TCGA-A7-A0DA-01	30.53	48.1	LEFT
TCGA-D8-A1JA-01	30.5	39.44	LEFT
TCGA-EW-A1OW-01	30.49	46.1	LEFT
TCGA-AN-A0AL-01	30.49	43.62	LEFT
TCGA-B6-A1KF-01	30.44	44.44	RIGHT
TCGA-GM-A2DF-01	30.4	44.32	LEFT
TCGA-WT-AB41-01	30.36	39.75	LEFT
TCGA-AO-A0J4-01	30.33	45.08	LEFT
TCGA-A8-A06Q-01	30.3	45.32	LEFT
TCGA-C8-A1HF-01	30.29	45.86	LEFT
TCGA-D8-A1X6-01	30.28	39.53	LEFT
TCGA-E2-A1LK-01	30.27	45.71	LEFT
TCGA-D8-A27M-01	30.27	43.08	LEFT
TCGA-A2-A0CW-01	30.2	43.87	RIGHT
TCGA-AO-A03U-01	30.18	40.16	LEFT
TCGA-BH-A1FM-01	30.15	38.16	RIGHT
TCGA-A7-A5ZV-01	30.11	43.91	LEFT
TCGA-E9-A5UP-01	30.04	38.91	LEFT
TCGA-A2-A0CX-01	30.03	44.59	LEFT
TCGA-AC-A23H-01	30.01	41.72	RIGHT
TCGA-D8-A143-01	29.98	48.79	LEFT
TCGA-A7-A26F-01	29.96	45.54	LEFT
TCGA-AO-A03O-01	29.96	45.13	RIGHT
TCGA-AO-A1KR-01	29.91	44.9	RIGHT
TCGA-BH-A0B9-01	29.89	46.45	RIGHT
TCGA-BH-A1F6-01	29.84	45.23	LEFT
TCGA-AO-A129-01	29.82	48.52	LEFT
TCGA-A7-A4SD-01	29.68	45.62	RIGHT
TCGA-A8-A094-01	29.6	42.53	LEFT
TCGA-B6-A402-01	29.51	45.78	RIGHT
TCGA-E2-A14W-01	29.48	40.37	LEFT
TCGA-A2-A1G1-01	29.45	45.34	RIGHT
TCGA-AO-A124-01	29.33	46.58	LEFT
TCGA-A2-A0YE-01	29.31	46.74	RIGHT
TCGA-E2-A1IP-01	29.26	44.14	RIGHT
TCGA-C8-A12Z-01	29.23	41.34	RIGHT
TCGA-C8-A278-01	29.15	44.93	LEFT
TCGA-BH-A0C0-01	29.12	45.36	LEFT
TCGA-BH-A0DZ-01	29.09	40.72	RIGHT
TCGA-A2-A3XX-01	29.08	47.24	LEFT
TCGA-E9-A244-01	29.05	44.46	LEFT
TCGA-A2-A4S1-01	29.05	40.72	RIGHT
TCGA-D8-A1JT-01	28.96	37.89	LEFT
TCGA-C8-A1HM-01	28.94	43.49	LEFT
TCGA-AN-A0FJ-01	28.91	50.39	LEFT
TCGA-D8-A1XL-01	28.91	45.2	LEFT
TCGA-BH-A0AV-01	28.83	45.81	LEFT
TCGA-B6-A0IJ-01	28.76	46.68	RIGHT
TCGA-B6-A0RL-01	28.74	44.64	LEFT
TCGA-C8-A131-01	28.67	46.73	LEFT
TCGA-BH-A0BG-01	28.59	44.85	LEFT
TCGA-A7-A6VY-01	28.51	45.26	RIGHT
TCGA-S3-AA10-01	28.39	47.98	RIGHT
TCGA-E2-A1LI-01	28.36	46.25	LEFT
TCGA-AN-A0FL-01	28.3	39.89	LEFT
TCGA-AR-A0U0-01	28.16	44.94	LEFT
TCGA-OL-A66I-01	28.15	48.13	RIGHT
TCGA-B6-A0RE-01	28	48.6	RIGHT
TCGA-A2-A0D2-01	28	47.56	LEFT
TCGA-D8-A1JK-01	27.92	43.99	LEFT
TCGA-AC-A2QJ-01	27.74	40.74	LEFT
TCGA-A2-A0YM-01	27.62	48.2	LEFT
TCGA-AR-A1AI-01	27.59	47.38	LEFT
TCGA-AR-A0TW-01	27.55	38.85	RIGHT
TCGA-A2-A04U-01	27.48	47.57	RIGHT
TCGA-A8-A08R-01	27.44	46.39	LEFT
TCGA-BH-A18V-01	27.37	43.81	RIGHT
TCGA-OL-A5S0-01	27.35	45.69	RIGHT
TCGA-A2-A3XT-01	27.3	46.06	LEFT
TCGA-B6-A409-01	27.25	46.93	RIGHT
TCGA-OL-A6VO-01	27.21	48.08	RIGHT
TCGA-E9-A3QA-01	27.18	44.93	LEFT
TCGA-BH-A0E0-01	27.06	46.29	LEFT
TCGA-E2-A150-01	26.97	47.6	LEFT
TCGA-BH-A0B3-01	26.92	46.54	RIGHT
TCGA-E2-A573-01	26.91	46.55	RIGHT
TCGA-A8-A07C-01	26.9	47.24	RIGHT
TCGA-AO-A0J6-01	26.89	44.9	LEFT
TCGA-AO-A0J2-01	26.8	44.83	LEFT
TCGA-AR-A1AH-01	26.79	45.98	RIGHT
TCGA-A2-A3XV-01	26.71	40.12	RIGHT
TCGA-D8-A1XQ-01	26.63	46.7	RIGHT
TCGA-A8-A09Z-01	26.63	38.11	RIGHT
TCGA-A2-A0T2-01	26.51	43.59	RIGHT
TCGA-UU-A93S-01	26.51	39.96	RIGHT
TCGA-EW-A1P4-01	26.42	44.34	LEFT
TCGA-E2-A14N-01	26.37	48.16	RIGHT
TCGA-E9-A1ND-01	26.34	44.58	LEFT
TCGA-E9-A1RH-01	26.31	43.54	RIGHT
TCGA-C8-A137-01	26.27	42.77	LEFT
TCGA-A2-A3Y0-01	26.23	47.73	LEFT
TCGA-BH-A18G-01	26.18	41.07	RIGHT
TCGA-AR-A1AR-01	26.16	43.3	LEFT
TCGA-A2-A3XU-01	25.91	44.11	LEFT
TCGA-EW-A1P8-01	25.89	47.44	LEFT
TCGA-AC-A2BK-01	25.86	51.1	LEFT
TCGA-OL-A5D7-01	25.83	49.32	LEFT
TCGA-A2-A0T0-01	25.83	46.56	LEFT
TCGA-AC-A6IW-01	25.82	45.86	LEFT
TCGA-AR-A256-01	25.81	44.55	RIGHT
TCGA-S3-AA0Z-01	25.55	47.59	LEFT
TCGA-E2-A158-01	25.5	46.16	LEFT
TCGA-C8-A12K-01	25.46	43.98	RIGHT
TCGA-AN-A0AT-01	25.4	47.37	RIGHT
TCGA-A7-A6VW-01	25.36	48.49	LEFT
TCGA-BH-A0BW-01	25.35	44.64	LEFT
TCGA-A8-A07O-01	25.3	43.95	RIGHT
TCGA-AN-A0G0-01	25.23	46.37	RIGHT
TCGA-A7-A13E-01	25.22	50.59	LEFT
TCGA-B6-A0X1-01	25.2	43.57	LEFT
TCGA-D8-A1Y3-01	25.18	45.32	RIGHT
TCGA-E9-A22G-01	25.06	50.67	LEFT
TCGA-E2-A1LL-01	25.04	44.66	LEFT
TCGA-A2-A0CM-01	25.02	47.63	LEFT
TCGA-BH-A0DL-01	25.02	44.93	LEFT
TCGA-E2-A574-01	24.95	47.78	LEFT
TCGA-AC-A62X-01	24.8	46.55	LEFT
TCGA-A2-A0D0-01	24.59	47.58	LEFT
TCGA-LL-A6FR-01	24.51	43.7	RIGHT
TCGA-AO-A128-01	24.27	42.67	RIGHT
TCGA-BH-A0EE-01	24.15	41.36	RIGHT
TCGA-BH-A1FC-01	24.12	47.4	RIGHT
TCGA-D8-A1XK-01	24.06	43.92	LEFT
TCGA-E2-A14R-01	23.95	48.17	LEFT
TCGA-EW-A6SB-01	23.92	47.52	LEFT
TCGA-GM-A3XL-01	23.9	47.14	RIGHT
TCGA-BH-A5IZ-01	23.18	43.18	LEFT
TCGA-E2-A14Y-01	22.92	43.29	RIGHT
TCGA-AR-A0U4-01	22.68	44.66	LEFT
TCGA-AR-A0TU-01	22.55	48.45	RIGHT
TCGA-AR-A5QQ-01	22.01	43.48	RIGHT
TCGA-E2-A1II-01	21.42	49.23	LEFT
TCGA-EW-A1PB-01	21.3	44.33	RIGHT
TCGA-BH-A18T-01	21	49.01	RIGHT
TCGA-B6-A0I2-01	20.75	44.85	LEFT
TCGA-A2-A0YJ-01	20.38	47.56	LEFT
TCGA-C8-A27B-01	20.33	46.46	LEFT
TCGA-AQ-A54N-01	20.13	46	LEFT
