# Supplementary material for: The Yin and Yang of Breast Cancer: Ion Channels as Determinants of Left-Right Functional Differences
Source: Preprints.org preprint supplement (doi:10.20944/preprints202305.1160.v1), 2023-05-16
Supplement: Supplementary file 8 [file SupFile5.xlsx]

## Sheet: ddPCR CD44
Well	Sample	Target	DyeName(s)	Accepted Droplets	Positives	Conc(copies/µL)	Conc RATIO			LEFT RATIO	RIGHT RATIO
							CD44/HPRT		M1	2.38453	1.2989
B02	1 M1 LEFT	CD44	FAM Hi	18199	119	7.71799	2.38453		M2	2.44129	2.03905
B02	1 M1 LEFT	HPRT	FAM Lo	18199	50	3.23669			M4	2.50108	2.27122
									M5	2.31562	1.3251
B03	2 M1 RIGHT	CD44	FAM Hi	16996	74	5.1335	1.2989
B03	2 M1 RIGHT	HPRT	FAM Lo	16996	57	3.9522
B04	3 M2 LEFT	CD44	FAM Hi	18790	151	9.49253	2.44129
B04	3 M2 LEFT	HPRT	FAM Lo	18790	62	3.88833
B05	4 M2 RIGHT	CD44	FAM Hi	17794	114	7.56149	2.03905
B05	4 M2 RIGHT	HPRT	FAM Lo	17794	56	3.70834
B08	7 M4 LEFT	CD44	FAM Hi	18167	187	12.1726	2.50108
B08	7 M4 LEFT	HPRT	FAM Lo	18167	75	4.86695
B09	8 M4 RIGHT	CD44	FAM Hi	20209	93	5.42651	2.27122
B09	8 M4 RIGHT	HPRT	FAM Lo	20209	41	2.38925
C02	9 M5 LEFT	CD44	FAM Hi	15607	74	5.59146	2.31562
C02	9 M5 LEFT	HPRT	FAM Lo	15607	32	2.41467
C03	10 M5 RIGHT	CD44	FAM Hi	12486	234	22.2574	1.3251
C03	10 M5 RIGHT	HPRT	FAM Lo	12486	177	16.7968
C04	11 NTC	CD44	FAM Hi	10535	0	0
C04	11 NTC	HPRT	FAM Lo	10535	0	0

## Sheet: ddPCR ki67
Well	Sample	Target	DyeName(s)	Conc(copies/µL)	Copies/20µLWell	Accepted Droplets	Positives	KI67/HPRT			LEFT RATIO	RIGHT RATIO
								Conc(copies/µL)		M1	1.44765	0.685499
C05	12 M1 LEFT	Ki67	FAM Lo	4.42919	88.5839	18096	68	1.44765		M2	1.7878	1.36428
C05	12 M1 LEFT	HPRT	FAM Hi	3.05957	61.1915	18096	47			M4	2.72347	1.63454
										M5	2.00158	0.792221
C06	13 M1 RIGHT	Ki67	FAM Lo	1.60711	32.1422	17581	24	0.685499
C06	13 M1 RIGHT	HPRT	FAM Hi	2.34443	46.8887	17581	35
C07	14 M2 LEFT	Ki67	FAM Lo	8.94804	178.961	18609	141	1.7878
C07	14 M2 LEFT	HPRT	FAM Hi	5.00505	100.101	18609	79
C08	15 M2 RIGHT	Ki67	FAM Lo	4.15861	83.1723	17004	60	1.36428
C08	15 M2 RIGHT	HPRT	FAM Hi	3.04821	60.9642	17004	44
D03	18 M4 LEFT	Ki67	FAM Lo	12.5763	251.526	17869	190	2.72347
D03	18 M4 LEFT	HPRT	FAM Hi	4.61776	92.3551	17869	70
D04	19 M4 RIGHT	Ki67	FAM Lo	4.46202	89.2405	12944	49	1.63454
D04	19 M4 RIGHT	HPRT	FAM Hi	2.72984	54.5969	12944	30
D05	20 M5 LEFT	Ki67	FAM Lo	3.71619	74.3238	15854	50	2.00158
D05	20 M5 LEFT	HPRT	FAM Hi	1.85663	37.1326	15854	25
D06	21 M5 RIGHT	Ki67	FAM Lo	14.7616	295.232	15719	196	0.792221
D06	21 M5 RIGHT	HPRT	FAM Hi	18.6332	372.664	15719	247
D07	22 NTC	Ki67	FAM	0.211564	4.23127	16684	3
D07	22 NTC	HPRT	HEX	0	0	16684	0
