# Supplementary material for: The Yin and Yang of Breast Cancer: Ion Channels as Determinants of Left-Right Functional Differences
Source: Preprints.org preprint supplement (doi:10.20944/preprints202305.1160.v1), 2023-05-16
Supplement: Supplementary file 9 [file SupFile6.xlsx]

## Sheet: CD44
	LEFT SAMPLES
		Actin	CD44	Mean CD44	Mean Actin	Δ Cq
	12	22.43	25.69	26.0067	22.39	3.61667
	12	22.23	26.08
	12	22.51	26.25
	115	20.91	24.91	24.72	21.0033	3.71667
	115	21.06
	115	21.04	24.53
	116	19.87	23.25	23.42	19.94	3.48
	116		23.59
	116	20.01
	127	25.33	29.63	29.96	25.6933	4.26667
	127	25.92
	127	25.83	30.29
	177	21.09	25.13	25.33	21.115	4.215
	177		25.53
	177	21.14
	RIGHT SAMPLES
		Actin	CD44	Mean CD44	Mean Actin	Δ Cq
	6	27.57	30.83	31.25	27.535	3.715
	6
	6	27.5	31.67
	19	20.85	24.27	24.5933	20.8533	3.74
	19	20.67	25.04
	19	21.04	24.47
	126	25.54		29.29	25.235	4.055
	126	24.93	29.45
	126		29.13
	129		25.89	25.8133	22.2	3.61333
	129	22.09	26.05
	129	22.31	25.5

## Sheet: KI67
	LEFT SAMPLES
		Actin	CD44	Mean CD44	Mean Actin	Δ Cq
	12	21.18	25.68	26.9	21.4567	5.44333
	12	21.34	27.13
	12	21.85	27.89
	115	23.53	29.58	30.4467	23.55	6.89667
	115	23.44	31.3
	115	23.68	30.46
	116	20.78		27.325	20.4233	6.90167
	116	19.75	27.22
	116	20.74	27.43
	127	26.87	30.68	31.6167	26.9333	4.68333
	127	26.69	32.18
	127	27.24	31.99
	134		29.91	28.7633	22.855	5.90833
	134	21.97	27.55
	134	23.74	28.83
	177	21.89		30.6	21.6167	8.98333
	177	21	30.32
	177	21.96	30.88
	RIGHT SAMPLES
		Actin	CD44	Mean CD44	Mean Actin	Δ Cq
	6	27.93	29.98	30.595	27.3433	3.25167
	6	27.28	31.21
	6	26.82
	19	21.06	27.33	25.7933	21.5933	4.2
	19	22.19	23.58
	19	21.53	26.47
	110	27.77	30.94	30.4533	28.1	2.35333
	110	28.43	32.69
	110		27.73
	126	23.67	27.98	27.33	23.06	4.27
	126	22.86
	126	22.65	26.68
	147	23.85	31.24	31.07	23.8667	7.20333
	147	23.57	30.78
	147	24.18	31.19
	129	24.91	30.14	30.99	25.0767	5.91333
	129	24.9	31.09
	129	25.42	31.74
